## **Binding stoichiometry and structural model of the HIV-1 Rev/Importin $\beta$ complex**

Didier Spittler<sup>1</sup>, Rose-Laure Indorato<sup>1</sup>, Elisabetta Boeri Erba<sup>1</sup>, Elise Delaforge<sup>1</sup>, Luca Signor<sup>1</sup>,  
Simon J. Harris<sup>1</sup>, Isabel Garcia-Saez<sup>1</sup>, Andrés Palencia<sup>2</sup>, Frank Gabel<sup>1</sup>, Martin Blackledge<sup>1</sup>,  
Marjolaine Noirclerc-Savoie<sup>1\*</sup>, Carlo Petosa<sup>1\*</sup>

<sup>1</sup> Univ. Grenoble Alpes, CEA, CNRS, Institut de Biologie Structurale (IBS), 71 Avenue des Martyrs, 38000  
Grenoble, France

<sup>2</sup> Institute for Advanced Biosciences (IAB), Structural Biology of Novel Targets in Human Diseases,  
INSERM U1209, CNRS UMR5309, Université Grenoble Alpes, Grenoble, France

\*Corresponding authors: [marjolaine.noirclerc@ibs.fr](mailto:marjolaine.noirclerc@ibs.fr), [carlo.petosa@ibs.fr](mailto:carlo.petosa@ibs.fr)

## ABSTRACT

HIV-1 Rev mediates the nuclear export of intron-containing viral RNA transcripts and is essential for viral replication. Rev is imported into the nucleus by the host protein Importin  $\beta$  (Imp $\beta$ ), but how Rev associates with Imp $\beta$  is poorly understood. Here we report biochemical, biophysical and structural studies of the Imp $\beta$ /Rev complex. Gel shift, native mass spectrometry and isothermal titration calorimetry data reveal that Imp $\beta$  binds two Rev monomers through independent binding sites. Small-angle X-ray scattering (SAXS) data suggest that the HEAT repeats of Imp $\beta$  retain an extended conformation upon binding Rev, which according to NMR data is primarily recognized through its helical hairpin domain. Peptide scanning data and charge-reversal mutations identify the N-terminal tip of Rev helix  $\alpha 2$  within Rev's Arginine-Rich Motif (ARM) as a primary Imp $\beta$  binding epitope. Crosslinking mass spectrometry and compensatory mutagenesis data combined with molecular docking simulations suggest a structural model in which one Rev monomer binds to the C-terminal half of Imp $\beta$  with Rev helix  $\alpha 2$  roughly parallel to the HEAT-repeat superhelical axis while the other monomer binds to the N-terminal half. These findings shed light on the molecular basis of Rev recognition by Imp $\beta$  and highlight an atypical binding behaviour that distinguishes Rev from canonical cellular Imp $\beta$  cargos.

## INTRODUCTION

The HIV-1 protein Rev (Regulator of Expression of the Virion) is an RNA-binding protein essential for the production of mature viral particles<sup>1,2</sup> (reviewed in refs.<sup>3-5</sup>). The initial RNA molecule that results from proviral DNA transcription is differentially processed into multiply spliced transcripts that encode Rev and other early-stage viral proteins, as well as partly spliced and unspliced transcripts that encode viral structural and enzymatic proteins and provide genomic RNA for encapsidation. Host cell mechanisms rapidly export fully spliced transcripts to the cytoplasm but retain incompletely spliced molecules in the nucleus<sup>6,7</sup>. Rev circumvents these mechanisms by mediating the nuclear export of intron-containing viral transcripts<sup>8-10</sup>. Rev binds to these transcripts by recognizing the Rev-response element (RRE), a ~350-nucleotide region that adopts a complex stem-loop structure<sup>8,9,11,12</sup>. A first Rev monomer binds with high affinity to a small region of the RRE, stem loop IIB, triggering the cooperative binding of additional Rev monomers to the RRE<sup>13,14</sup>. The Rev/RRE complex is then exported to the cytoplasm by the nuclear export factor CRM1<sup>15-17</sup>, allowing for synthesis of late-stage viral proteins as well as packaging of the replicated viral genome into new viral particles. Other reported roles for Rev include regulating the splicing<sup>18-20</sup>, translation<sup>21-23</sup> and encapsidation<sup>24-26</sup> of viral RNAs; modulating the stability or localization of the HIV-1 proteins Tat<sup>27</sup> and integrase (IN)<sup>28,29</sup>; and interacting with host cell molecules<sup>30</sup>, such as RNA helicases and hnRNPs<sup>31-35</sup>.

In order to bind RRE-containing viral transcripts and perform other nuclear functions, Rev must first be imported from the cytosol, a step mediated by host cell proteins of the karyopherin/importin- $\beta$  family (reviewed in refs.<sup>36-41</sup>). Different members of this family have been implicated as potential Rev import factors, including Importin  $\beta$  (Imp $\beta$ ), Transportin-1, Transportin-5 and Transportin-7<sup>42-45</sup>. One study reported that Rev is imported

by Imp $\beta$  in T-lymphocyte derived (293T, Jurkat and CEM) cell lines, and by Transportin-1 in HeLa cells and in a monocytic (THP-1) and histocytic (U937) cell line, revealing that the Rev import pathway is host-cell dependent<sup>45</sup>. Given the central role of CD4+ T lymphocytes for HIV-1 biology, the present study focuses on the Imp $\beta$  pathway.

Imp $\beta$  heterodimerizes with importin  $\alpha$  (Imp $\alpha$ ) to import proteins bearing a classical nuclear localization signal (NLS), which typically contains 1 or 2 clusters of basic residues<sup>37</sup>. Imp $\alpha$  uses its C-terminal domain to recognize the NLS<sup>46,47</sup> and its N-terminal Imp $\beta$ -binding (IBB) domain to associate with Imp $\beta$ <sup>48</sup>. HIV-1 Rev bypasses this pathway by directly interacting with Imp $\beta$  and is imported independently of Imp $\alpha$ <sup>42</sup>. Imp $\beta$  is regulated by Ran, a Ras-related GTPase which is predominantly bound to GTP in the nucleus and to GDP in the cytosol. Imp $\beta$  associates with its cargo (directly or via Imp $\alpha$ ) in the cytosol, translocates through the nuclear pore complex via favourable interactions with FG-repeat containing nucleoporins, and releases the cargo in the nucleus upon binding RanGTP. Atomic structures are known for Imp $\beta$  in the unbound state<sup>49,50</sup> and in complex with Ran<sup>51-53</sup>, nucleoporins<sup>54-56</sup>, importin<sup>757</sup> and diverse macromolecular cargos<sup>48,57-63</sup>. Imp $\beta$  is a spiral shaped molecule composed of 19 tandem helical hairpin motifs called HEAT repeats, with each hairpin comprising an outward-facing "A" helix and an inward-facing "B" helix. RanGTP and the cargo bind on the inner concave surface of the spiral, with different cargos interacting with different subsets of the HEAT repeats. The outer convex surface of Imp $\beta$  interacts with nucleoporins that constitute the nuclear pore complex<sup>54-56</sup>.

Structures are known for HIV-1 Rev and Rev-derived peptides, either alone<sup>64-68</sup>, bound to an antibody<sup>69</sup>, or in complex with RNA<sup>70-75</sup> or with CRM1 and RanGTP<sup>76</sup>. Standard lab isolates of Rev contain 116 amino acid residues. These define an N-terminal domain (NTD) that mediates nuclear import, RNA-binding and multimerization, and an intrinsically disordered C-terminal domain (CTD) responsible for nuclear export (**Figure 1a**). The CTD contains a leucine-rich nuclear export signal (NES; res. 75-83) which is recognized in the nucleus by CRM1 in complex with RanGTP. Residues C-terminal to the NES enhance protein stability<sup>77,78</sup>, become partly ordered when Rev forms filaments<sup>67</sup>, and have been predicted to interact with the NTD<sup>79</sup> and to regulate accessibility of the NES<sup>80</sup>. The NTD includes an  $\alpha$ -helical hairpin (res. 10-65) characterized by an Arginine-rich motif (ARM; res. 35-50) that mediates RRE-binding<sup>13,81-84</sup> and contains the NLS recognized by Imp $\beta$ <sup>42,43</sup>. The N-terminal 10 residues are important for protein stability<sup>78</sup> but appear not to constitute a significant interaction epitope<sup>31</sup>. Hydrophobic residues on either side of the ARM comprise an oligomerization domain responsible for Rev multimerization<sup>13,14,85</sup>. These residues localize to both faces of the helical hairpin (denoted "head" and "tail" surfaces) and mediate three types of homotypic interactions (**Figure 1b**). Tail-to-tail (also called B-B) interactions mediate dimer formation following the initial association of Rev with the RRE<sup>65,74,85</sup>. Head-to-head (or A-A) interactions mediate higher-order Rev oligomer formation<sup>69,85</sup>. The third type of interaction, called C-C, involves the proline-rich interhelical loop and is proposed to bridge independently bound Rev dimers on the RRE surface<sup>67</sup>. These three types of interface allow Rev to adapt to a wide variety of RNA sites on the RRE.

To gain insights into how Imp $\beta$  associates with Rev, we analysed the Imp $\beta$ /Rev complex using diverse biochemical, biophysical and structural approaches together with molecular docking simulations. Unexpectedly, our data reveal that Imp $\beta$  associates with two Rev monomers through distinct binding sites. Moreover, they allow

us to localize one monomer near the N-terminal end of the HEAT-repeat superhelix and to deduce an approximate structural model of the other Rev monomer bound near the opposite, C-terminal end. The ability to engage two independent binding sites on Imp $\beta$  identifies Rev as an atypical nuclear import cargo.

## RESULTS

### Use of point mutations to disrupt Rev oligomerization

Our initial efforts to study the Imp $\beta$ /Rev interaction were hampered by the tendency of Rev to aggregate under the low to medium ionic strength conditions required for stable Imp $\beta$ /Rev complex formation. Previous studies reported several point mutations that hinder Rev multimerization<sup>13,65,85-89</sup>, including mutations V16D and I55N which destabilize the homotypic A-A and B-B interfaces, respectively (**Figure 1b**)<sup>85,89</sup>. In particular, the double V16D/I55N mutant was previously used for biophysical studies of Rev, including single-molecule fluorescence spectroscopy<sup>90</sup> and NMR<sup>66</sup> experiments. Accordingly, we generated Rev mutants V16D and V16D/I55N, as well as a truncated version (residues 4-69) of the V16D/I55N mutant lacking the C-terminal domain. Bacterially expressed Rev proteins were purified to homogeneity and their oligomeric state verified by size exclusion chromatography/multi-angle laser light scattering (SEC/MALLS; **Figure 1c**). Wildtype (WT) Rev eluted as two separate peaks: the first contained molecular species ranging between 330 and 500 kDa in mass (suggesting Rev multimers comprising approximately 24-36 monomers) while the second exhibited masses of 40-80 kDa (consistent with species comprising 3-6 Rev monomers), confirming the highly polydisperse nature of Rev. The V16D mutant eluted later than WT Rev, yielding a broad peak with a mass distribution (15-45 kDa) consistent with a mixture of species comprising 1-3 Rev monomers. The mass observed at the maximum of this peak (~23 kDa) indicated a prevalence of the dimeric form (27.6 kDa), in agreement with previous findings<sup>85,89</sup>. By contrast, both the full-length and truncated versions of the V16D/I55N mutant eluted as relatively narrow peaks with mass distributions centered around 13.3 and 7.5 kDa, respectively, consistent with a monomeric state (13.8 and 8.0 kDa, respectively). The monodisperse nature of the V16D/I55N mutant facilitated several of the interaction studies with Imp $\beta$  described below. For convenience, we refer to the full-length and truncated versions of this mutant as Rev<sup>OD</sup> (for oligomerization-deficient Rev) and Rev<sup>OD</sup> $\Delta$ , respectively.

### Imp $\beta$ binds up to two monomers of Rev

We next assessed the ability of Rev to associate with Imp $\beta$ . SEC analysis revealed that unbound Imp $\beta$  and Rev<sup>OD</sup> each eluted as a single peak, whereas pre-incubating Imp $\beta$  with a molar excess of Rev<sup>OD</sup> led to the co-elution of both proteins within an earlier peak, indicating complex formation (**Figure 1d**). SEC/MALLS analysis revealed a molecular mass for the Imp $\beta$ /Rev<sup>OD</sup> complex of 105 kDa (**Figure 1e**), consistent with the mass expected for 1:1 stoichiometry (110.6 kDa). Imp $\beta$ /Rev<sup>OD</sup> complex formation was confirmed by native gel analysis, which revealed a single band for unbound Imp $\beta$  and a discrete shift upon the addition of increasing concentrations of Rev<sup>OD</sup> (**Figure 1f**, Complex 1). Surprisingly, higher Rev<sup>OD</sup> concentrations resulted in a supershift, suggesting the formation of an additional species containing two or more Rev monomers (**Figure 1f**, Complex 2). The higher

Rev<sup>OD</sup> concentrations required for the supershifted band and the failure to detect Complex 2 by SEC/MALLS suggest that this complex is less stable than Complex 1 and likely dissociates over the course of the chromatographic run. A glutaraldehyde crosslinking experiment followed by mass spectrometry (MS) analysis corroborated the ability of Imp $\beta$  to bind two Rev monomers (**Figure S1**).

To further verify the stoichiometry of the Imp $\beta$ /Rev association we performed native MS, which preserves non-covalent interactions and allows the mass of intact macromolecular complexes to be determined<sup>91</sup>. To ensure correct interpretation of native MS spectra, we first used liquid chromatography coupled to electrospray ionization MS (LC/ESI-MS) to measure accurate masses under denaturing conditions for the unbound Imp $\beta$  and Rev<sup>OD</sup> proteins; these were 97,300 Da and 13,264 Da, respectively, which are within 1 Da of the theoretical masses (**Figure S2** and **Table S5**). Native MS analysis of unbound Imp $\beta$  yielded a clear set of peaks whose *m/z* values correspond to a mass of 97,296 Da (**Figure 2a** and **g**), closely matching that determined by ESI-TOF. We next incubated Imp $\beta$  with Rev<sup>OD</sup> and measured the masses of the resulting species (**Figure 2b, c** and **g**). Mixing Imp $\beta$  with a 2-fold molar equivalent of Rev<sup>OD</sup> led to the appearance of two additional sets of peaks: the first corresponds to a mass of 110,558 Da (**Figure 2b**, blue circles), matching the expected mass of an Imp $\beta$ /Rev<sup>OD</sup> heterodimer (110,563 Da), and the second to a mass of 123,829 Da (**Figure 2b**, green circles), consistent with a complex of Imp $\beta$  bound to two Rev<sup>OD</sup> monomers (123,827 Da). Mixing Imp $\beta$  with Rev<sup>OD</sup> in a 1:5 molar ratio enhanced the intensity of this second set of signals (**Figure 2c**). Mixing Imp $\beta$  with the truncated construct (Rev<sup>OD</sup> $\Delta$ ) instead of full length Rev<sup>OD</sup> yielded an analogous set of peaks for Imp $\beta$ /Rev<sup>OD</sup> $\Delta$  complexes having a stoichiometry of 1:1 (mass: 105,330 Da) and 1:2 (113,366 Da) (**Figure 2d** and **g**). Taken together these results confirm the ability of Imp $\beta$  to bind up to two monomers of Rev<sup>OD</sup>.

We then investigated complex formation between Imp $\beta$  and Rev<sup>WT</sup>. We overcame the tendency of Rev<sup>WT</sup> to oligomerise by exchanging its buffer into a high concentration of ammonium acetate prior to incubating with Imp $\beta$  and using relatively low Rev<sup>WT</sup> concentrations (10-20  $\mu$ M). Upon mixing Imp $\beta$  with a 2-fold molar equivalent of Rev<sup>WT</sup>, we detected peaks consistent with the formation of a 1:1 Imp $\beta$ :Rev<sup>WT</sup> complex (110,476 Da; **Figure 2e**). With a 5-fold molar equivalent of Rev<sup>WT</sup> we detected both 1:1 and 1:2 complexes (123,649 Da; **Figure 2f**). This confirms that Imp $\beta$  can bind either one or two molecules of WT Rev.

### **Imp $\beta$ recognizes the Rev helical hairpin through a high- and a low-affinity binding site**

We next characterized the Imp $\beta$ /Rev interaction using isothermal titration calorimetry (ITC). We recorded ITC profiles for the binding of Imp $\beta$  to either Rev<sup>OD</sup> or Rev<sup>OD</sup> $\Delta$ . Fitting the resulting binding isotherms using a model consisting of a single class of binding sites resulted in a poor fit, whereas a good fit was obtained with a model consisting of two non-symmetric classes of binding sites (**Figure 3a,b**), further confirming the ability of Imp $\beta$  to bind two Rev monomers. These analyses yielded a dissociation constant ( $K_d$ ) for the Imp $\beta$ /Rev<sup>OD</sup> interaction of 0.8  $\mu$ M for the first site and 9.6  $\mu$ M for the second site. Comparable  $K_d$  values (0.7 and 4.6  $\mu$ M) were obtained for the Imp $\beta$ /Rev<sup>OD</sup> $\Delta$  interaction, suggesting that the C-terminal domain missing from Rev<sup>OD</sup> $\Delta$  does not contribute significantly to binding affinity.

The finding that Imp $\beta$  binds one Rev monomer with submicromolar affinity and the other with  $\sim$ 10-fold weaker affinity is consistent with the sequential appearance of complexes observed when Imp $\beta$  is titrated with Rev (**Figures 1f, 2** and **S1a**) and with the inability to detect the more weakly bound Rev monomer by SEC-MALLS (**Figure 1e**). The interaction of Imp $\beta$  with both the first and second Rev monomers is enthalpically driven (**Figure 3c and d**), suggesting electrostatic and hydrogen bond interactions that presumably take place between the highly basic ARM of Rev and the acidic cargo-binding inner surface of Imp $\beta$ . Interestingly, whereas the higher affinity interaction (site 1) is associated with a negligible entropy change, the lower affinity interaction (site 2) is characterized by an unfavourable entropy term, suggesting that the binding of the second Rev monomer might significantly reduce the conformational entropy of the Imp $\beta$  HEAT-repeat array, which is dynamically highly flexible in the unbound state<sup>92</sup>.

To further probe the regions of Rev involved in Imp $\beta$  binding, we performed NMR spectroscopy of <sup>15</sup>N-labelled Rev<sup>OD</sup> in the presence and absence of unlabelled Imp $\beta$ . Triple resonance NMR was used to assign the backbone resonances of <sup>15</sup>N-labelled Rev<sup>OD</sup>. The <sup>1</sup>H-<sup>15</sup>N-BEST-TROSY spectrum of free Rev<sup>OD</sup> shows peaks concentrated between 7.5 and 8.5 ppm (**Figure 4a**), in agreement with a previous study<sup>66</sup> and consistent with the expectation that Rev contains many intrinsically disordered residues<sup>93</sup>. In total 67 of the 116 residues of Rev could be assigned. Assignment was hampered by resonance overlap caused by the high (14%) arginine composition of the Rev sequence and the large number (10) of prolines, as well as severe line-broadening in the C-terminus of the helical hairpin, possibly due to residual oligomerization at concentrations used for NMR measurement (90  $\mu$ M). Analysis of the secondary <sup>13</sup>C chemical shifts showed a strong helical propensity for residues within the helical hairpin domain, as expected, as well as significant helical propensity for residues 84-93 (**Figure 4c**). The latter residues are immediately downstream of the NES and their helical propensity might facilitate recruitment of the NES to the binding surface of CRM1.

The addition of Imp $\beta$  to Rev<sup>OD</sup> had a dramatic effect on the spectrum, causing 28 peaks to disappear either completely (24 peaks) or nearly completely (4 peaks; >95% reduction in peak height) (**Figure 4b and d**). These peaks include all assigned peaks between residues 10 and 65, which delimit the helical hairpin domain. By contrast, peaks corresponding to N- and C-terminal regions of Rev (residues 2-9 and 73-116) were less affected by the presence of Imp $\beta$ . This finding indicates that Imp $\beta$  recognizes Rev primarily through its helical hairpin domain and interacts only weakly or not at all with the N-terminal extension and C-terminal domain, in agreement with the similar binding affinities measured by ITC for the interaction of Imp $\beta$  with Rev<sup>OD</sup> and Rev<sup>OD</sup> $\Delta$ .

### Imp $\beta$ retains an extended conformation upon Rev binding

We next sought structural information on the Imp $\beta$ /Rev complex using small-angle X-ray scattering, which was coupled with size-exclusion chromatography (SEC-SAXS) to ensure sample monodispersity. We measured data from Imp $\beta$  alone or in complex with Rev<sup>OD</sup> $\Delta$  and compared the observed scattering to that predicted for cargo-bound Imp $\beta$  conformations (cargo coordinates removed) available from the Protein Data Bank (PDB) (**Figure 5a**). The scattering profile of unbound Imp $\beta$  exhibits a shoulder at  $s \approx 0.1 \text{ \AA}^{-1}$  (**Figure 5b**), in agreement

with previous studies of unbound murine and fungal Imp $\beta$  proteins<sup>49,50,94</sup>. The radius of gyration ( $R_g$ ) and maximum dimension ( $D_{max}$ ) of unbound Imp $\beta$  determined from the pair distance distribution function were 37 Å and 125 Å, respectively, indicating that Imp $\beta$  adopts a more extended conformation in solution compared to cargo-bound crystal structures (**Figure 5a** and **c**). Consistent with this finding, the observed scattering showed the best agreement ( $\chi^2$  values < 4) with scattering curves calculated for Imp $\beta$  coordinates from PDB structures 1UKL and 3W5K, which exhibit the most elongated cargo-bound conformations (**Figure 5c**).

The binding of Rev<sup>OD</sup> $\Delta$  caused only modest changes in the scattering profile relative to that of unbound Imp $\beta$  (**Figure 5b**), corresponding to a small decrease in  $R_g$  and  $D_{max}$  values (to 36.7 Å and 120 Å respectively). These changes are consistent with the expected binding of Rev<sup>OD</sup> $\Delta$  to the concave inner surface of the HEAT-repeat array, which appears not to undergo a dramatic conformational change relative to the unbound state. (Note that these inferences only pertain to Imp $\beta$  bound to a single Rev monomer, since we were unable to identify conditions in which the second, more weakly bound Rev monomer remained associated with Imp $\beta$  over the course of the SEC column run). The small mass of Rev<sup>OD</sup> $\Delta$  relative to Imp $\beta$  and the large impact that changes in HEAT repeat conformation have on the predicted scattering curve preclude us from deducing a reliable structural model for the 1:1 Imp $\beta$ :Rev<sup>OD</sup> $\Delta$  complex. Nevertheless, the data reveal that the complex retains an extended conformation resembling that of unbound Imp $\beta$  and of the cargo-bound conformations 1UKL and 3W5K. Moreover, they confirm that Rev (at least the more tightly bound monomer) binds to the inner surface of Imp $\beta$ .

### Rev binding sites localize to N- and C-terminal regions of Imp $\beta$

To obtain additional structural insights into how Imp $\beta$  recognizes Rev we performed crosslinking-mass spectrometry (XL-MS) on the Imp $\beta$ /Rev complex using the amine-reactive crosslinker bisulfosuccinimidyl suberate (BS3). Although Rev contains two lysine residues (Lys20 and Lys115), BS3-mediated crosslinks with Imp $\beta$  were only detected for Lys20 and for the Rev N-terminal amino group (**Figure 6a**). Conversely, peptides containing BS3-modified Lys residues were identified for 28 of the 43 lysines present in Imp $\beta$ . These residues are distributed over the length of Imp $\beta$  and can be classified into three groups. Group 1 formed crosslinks with both the N-terminus and Lys20 of Rev; Group 2 formed crosslinks with the flexible Rev N-terminus but not with Lys20; and Group 3 formed monolinks (where only one end of BS3 covalently bound to the protein) or crosslinks with other Imp $\beta$  residues but did not form detectable crosslinks with Rev. Since Lys20 is located on Rev helix  $\alpha$ 1, Group-1 lysines on Imp $\beta$  are expected to localize close to Rev's helical hairpin, whereas lysines in Groups 2 and 3 are expected to be farther away. Interestingly, whereas Group-3 residues primarily reside on the A helix of a HEAT repeat and localize to the outer convex surface of Imp $\beta$ , nearly all Group-1 residues reside on a B helix and localize to the inner concave surface (**Figure 6b,c**), consistent with Rev recognition by the inner surface of Imp $\beta$ .

The 11.4 Å linker arm length of BS3 allows the C $\alpha$  atoms of crosslinked lysines to be up to ~24 Å apart; however, to allow for conformational dynamics, distance constraints of 30-35 Å are typically used for the purposes of 3D structural modelling<sup>95-97</sup>. For such modelling, the solvent-accessible surface (SAS) distance between crosslinked Lys residues is more informative than the straight-line (Euclidean) distance separating them, as the latter may

trace a path sterically inaccessible to the crosslinker<sup>98</sup>. Group 1 includes a cluster of lysines within HEAT repeats 1 and 2, and a second cluster within repeat 19, at the opposite extremity of Imp $\beta$ . These two clusters are too far apart to form crosslinks to the same Rev K20 residue position (**Figure 6d**). For example, if one considers the Imp $\beta$  conformation shown in **Figure 6e** (from PDB 1UKL), the C $\alpha$  atoms of residues Lys23 and Lys873 are separated by a SAS distance of 103 Å (Euclidean distance of 91.4 Å). Even for the most compact known conformation of Imp $\beta$  (from PDB 3LWW), residues Lys859, Lys867 and Lys873 are separated from Lys23 by a SAS distance of over 70 Å, twice the BS3 crosslinking distance constraint (**Figure S3a,b**). These findings are consistent with the ability of Imp $\beta$  to bind two Rev molecules and suggest that the two clusters of Group-1 lysines form crosslinks with distinct Rev monomers, one bound close to the N-terminal, and the other close to the C-terminal, extremity of Imp $\beta$ . We refer hereafter to these two Rev binding sites on Imp $\beta$  as the N-site and C-site, respectively.

Applying a 35 Å distance constraint from each residue in the two Group-1 lysine clusters localizes the Lys20 C $\alpha$  atoms of the two Rev monomers within an ellipsoidal volume next to the N- and C-terminal HEAT repeats with a positional uncertainty of ~22 Å (**Figure 6f** and **Figure S3c**). In contrast, Group-1 residues Lys206 and Lys537 could potentially crosslink with either Rev monomer. The fact that both these residues localize to the concave inner surface of Imp $\beta$  confirms that at least one of the two Rev monomers is bound to this surface.

### Imp $\beta$ recognizes peptides derived from Rev helix $\alpha$ 2

To delineate the region(s) of Rev recognized by Imp $\beta$  we examined the ability of different Rev-derived peptides to interact with Imp $\beta$  in a thermal shift assay. We used a set of 27 peptides (each comprising 15 residues) that span the entire Rev sequence, with an 11-residue overlap between consecutive peptides. We used differential scanning fluorimetry (DSF) to assess the ability of peptides to increase the thermal stability of Imp $\beta$ . In the absence of peptides, the melting temperature ( $T_m$ ) observed for Imp $\beta$  was  $35.4 \pm 0.7$  °C (**Figure 7a**). Whereas most Rev peptides did not significantly increase this value ( $\Delta T_m < 0.5$  °C), three consecutive Rev peptides (numbered 9 to 11) strongly stabilized Imp $\beta$  ( $\Delta T_m > 2$  °C), with peptide 10 (<sup>37</sup>ARRNRRRRWRERQRQ<sup>51</sup>), which contains all but one of the ARM's 10 Arg residues, yielding the strongest effect (**Figure 7a, b**). These peptides collectively span Rev residues 33-55 on helix  $\alpha$ 2 and the  $\alpha$ 1- $\alpha$ 2 loop and nearly perfectly match the ARM motif (res. 35-50) (**Figure 7c**).

The increased stabilization observed for peptide 10 compared to peptide 9 (<sup>33</sup>GTRQARRNRRRRWRE<sup>47</sup>) suggests that the Rev <sup>48</sup>RQRQ<sup>51</sup> motif includes an important binding epitope. Similarly, whereas Imp $\beta$  was strongly stabilized by Rev peptide 11 (<sup>41</sup>RRRRWRERQRQIRSI<sup>55</sup>), little or no stabilization was observed with peptide 12 (<sup>45</sup>WRERQRQIRSIGWI<sup>59</sup>), indicating that the tetra-arginine motif (<sup>41</sup>RRRR<sup>44</sup>) is critical for Imp $\beta$  binding. Finally, peptide 8 (<sup>29</sup>PSPEGTRQARRNRRR<sup>43</sup>), which contains three of these four Arg residues and a total of six closely spaced Arg residues, only modestly stabilizes Imp $\beta$  ( $\Delta T_m = 1.0 \pm 0.7$  °C), indicating that clustered Arg residues are not sufficient for high-affinity binding and that sequence context also plays an important role.



## The N-terminal tip of Rev helix $\alpha 2$ is a major Imp $\beta$ binding epitope

We next performed mutagenesis experiments to identify individual Rev residues critical for Imp $\beta$  recognition. Since Rev binding is likely to involve a significant electrostatic component, we sought to destabilize the Imp $\beta$ /Rev interface by introducing charge-reversal mutations on Rev. We first made mutants in which 2 or 3 basic residues were simultaneously replaced by Asp residues (mutants R1-R5; **Figure 8a**). We used a competitive fluorescence polarization (FP) assay to compare the ability of these proteins to bind Imp $\beta$  and displace a peptide cargo. In this assay the binding of Imp $\beta$  to a fluorescently labelled Rev peptide (Rev-NLS) yields an FP signal that decreases when the peptide is displaced by the addition of unlabelled Rev. The half-maximal inhibitory concentration ( $IC_{50}$ ) of the Rev protein tested (or its negative logarithm,  $pIC_{50}$ ) provides an indirect measure of Imp $\beta$ -binding affinity, with lower  $IC_{50}$  (higher  $pIC_{50}$ ) values corresponding to stronger binding.

Representative assays are shown in **Figure 8b** and the results summarized in **Figure 8c-e** and **Table S1**. Wildtype (WT) Rev competes with the Rev-NLS peptide with an  $IC_{50}$  value of 0.5  $\mu$ M, comparable to the  $K_d$  value of 0.8  $\mu$ M obtained by ITC. Of the five mutants tested, three (R2-R4) yielded a large (10-fold) increase in  $IC_{50}$ , while the other two (R1, R5) gave more modest (3- and 1.7-fold) increases. The three mutants with the greatest effect localized to one end of the helical hairpin (the N-terminal half of helix  $\alpha 2$  and the interhelical loop) and involved Arg clusters on both the A- and B-faces of Rev, whereas the mutants with more modest effects localized to the opposite end of the domain (helix  $\alpha 1$  and the C-terminal half of helix  $\alpha 2$ ) (**Figure 8a**), in line with our peptide-scanning data.

We then generated single point mutations of the nine Arg residues altered in mutants R2-R4. Four of these (R35D, R38D, R39D and R41D) significantly compromised the ability of Rev to compete with the Rev-NLS peptide, increasing the  $IC_{50}$  by a factor of 1.6-1.9 (versus a factor of 1.1-1.3 for the other mutants), corresponding to a drop in  $pIC_{50}$  of 0.20-0.27 (versus 0.04-0.11) (**Figure 8d,e**). Interestingly, the sum of the  $\Delta pIC_{50}$  values (-0.71) for mutations R35D, R38D and R39D approached that observed for the corresponding R2 mutant (-1.0), indicating that the effect of the triple mutation primarily reflects the additive effects of the single mutations (**Figure 8e**). In contrast, the  $\Delta pIC_{50}$  values for triple mutants R3 and R4 were 3-4 times larger in magnitude than the summed  $\Delta pIC_{50}$  values of the corresponding single mutations, revealing that reversing the charge at these combined positions had a synergistic effect on disrupting binding. Notably, plotting the  $\Delta pIC_{50}$  values of the nine R $\rightarrow$ D mutations onto the structure of Rev reveals a progressively greater effect of the mutation on Imp $\beta$  binding as one proceeds along helix  $\alpha 2$  towards its N-terminus and the interhelical loop (**Figure 8f**), consistent with the spatial trend noted above for the triple mutants. These findings point to the N-terminal tip of Rev helix  $\alpha 2$  as a major binding epitope recognized by Imp $\beta$ .

## Charge-reversal mutations on Imp $\beta$ and Rev show compensatory effects

We next sought to identify Imp $\beta$  residues implicated in Rev recognition by introducing charge reversal mutations on the acidic inner surface of Imp $\beta$ . Of the 57 Asp and Glu residues that localize to the protein's inner surface, we selected 22 that were prominently exposed or clustered into acidic patches for substitution by Arg

residues. To enhance the potential disruptive effect on Rev binding, we initially introduced these substitutions as double, triple or quadruple mutations (mutants B1-B7, **Figure 9a**). We then used our FP inhibition assay to compare the ability of WT Rev to displace the Rev-NLS peptide from WT or mutant forms of Imp $\beta$ . Only minor changes in the IC<sub>50</sub> value of Rev were observed when WT Imp $\beta$  (IC<sub>50</sub> = 0.5  $\mu$ M) was replaced by mutants B1-B7 (IC<sub>50</sub> = 0.43-0.55  $\mu$ M) (**Figure 9b** and **Table S1**), consistent with the expectation that the Imp $\beta$  mutations should not significantly alter Rev's ability to compete with the Rev-NLS peptide. We then repeated the assay using Rev double and triple mutants R1-R5. Strikingly, whereas the IC<sub>50</sub> values of mutants R1 and R5 showed little variation in assays performed with WT or mutant Imp $\beta$ , the IC<sub>50</sub> values of mutants R2-R4 varied considerably (**Figure 9c** and **Table S1**). Most notably, these values decreased from  $\sim$ 5  $\mu$ M when tested against WT Imp $\beta$  to  $\sim$ 1.6  $\mu$ M against mutant B2, signifying that Rev mutants R2-R4 competed with the Rev-NLS peptide with  $\sim$ 3 times greater efficacy when WT Imp $\beta$  was replaced by the B2 mutant. More modest (1.5-1.8 fold) decreases in IC<sub>50</sub> were also observed with mutants B1, B3 and B4. These findings reveal that the Asp/Glu $\rightarrow$ Arg substitutions on Imp $\beta$  partly compensate for the adverse effects of the Rev Arg $\rightarrow$ Asp mutations on the ability of Imp $\beta$  to bind Rev, suggesting a possible electrostatic interaction between the mutated acidic and basic residues (**Figure 9d**).

To assess the size of this compensatory effect and facilitate comparison across different combinations of Imp $\beta$  and Rev mutants we used the parameter  $\Delta\Delta pIC_{50}$ , whose derivation is illustrated for mutants B2 and R4 in **Figure 9e**. In this figure, replacing WT Rev (solid black circles) by mutant R4 (solid red circles) causes the  $pIC_{50}$  to drop from 6.3 to 5.3, yielding a  $\Delta pIC_{50}$  value of -1, whereas replacing both WT Rev and WT Imp $\beta$  by mutants R4 and B2, respectively (red diamonds), results in a  $\Delta pIC_{50}$  of only -0.5. Thus, compared to the former assay, the latter assay causes  $\Delta pIC_{50}$  to shift from -1 to -0.5, yielding a  $\Delta\Delta pIC_{50}$  value of +0.5. The  $\Delta\Delta pIC_{50}$  values for selected combinations of Imp $\beta$  and Rev mutants are shown in **Figures 9f** and **g**.

To pinpoint potentially interacting Imp $\beta$  and Rev residues, we generated single charge-reversal mutations of the nine Imp $\beta$  residues concerned by mutants B2-B4 and tested these in FP inhibition assays against Rev triple mutants R2-R4 and the corresponding Rev single point mutants shown in **Figure 8d**. The results revealed several combinations of Imp $\beta$  and Rev mutants that gave notable compensatory effects (**Figure 9f,g** and **Figure S4**). These effects were generally more significant when either Imp $\beta$  or Rev contained multiple mutations, as observed for example between Rev mutants R2-R4 and Imp $\beta$  mutant D288R, between Rev mutant R3 and Imp $\beta$  mutant D339R, and between Rev mutant R48D and Imp $\beta$  mutants B3 and B4. Of the 51 pairwise combinations of single point mutants tested, the strongest compensatory effects were seen for Imp $\beta$  mutant D288R with Rev mutants R42D and R46D ( $\Delta\Delta pIC_{50}$  = 0.41 and 0.33, respectively) and to a lesser extent R43D ( $\Delta\Delta pIC_{50}$  = 0.17) (**Figure 9g** and **Figure S4a-c**).  $\Delta\Delta pIC_{50}$  values exceeding 0.1 were also observed for Imp $\beta$  mutant E299R with Rev mutants R42D, R43D and R46D, for Imp $\beta$  E289R with Rev R46D, and for Imp $\beta$  E437R with Rev R48D (**Figure 9g** and **Figure S4d-g**). These findings identify Imp $\beta$  acidic residues on the B helices of HEAT repeats 7 and 10 that are likely to be spatially proximal to basic residues on Rev helix  $\alpha$ 2 (**Figure 9h**), providing important clues into the relative binding orientations of Imp $\beta$  and Rev.

## Molecular docking simulations associate certain compensatory mutations with the C-site of Imp $\beta$

The mutual proximity of Rev residues Arg42 and Arg46 on helix  $\alpha 2$  (**Figure 9h**) and the short distances (<18 Å) separating Imp $\beta$  residue Asp288 from residues Glu299 and Glu437 relative to the width of the Rev helical hairpin (20-25 Å) make it likely that the compensatory effects summarized in **Figure 9h** are all mediated by the same Rev monomer. However, whether that Rev monomer localizes to the N- or C-site on Imp $\beta$  is unclear. To explore this question, we performed molecular docking simulations to assess whether certain distance restraints could be attributed reliably to either site. We docked the Rev helical hairpin onto the Imp $\beta$  surface (using the extended 1UKL conformation as suggested by our SAXS data) with the program HADDOCK, which exploits experimentally derived interaction restraints to guide the docking procedure<sup>99</sup>. (For clarity, in the following description of interaction restraints, a superscript is used to indicate whether a residue belongs to either Rev or Imp $\beta$ ). In initial simulations we specified distance restraints derived from compensatory mutations involving residue pairs Asp288<sup>Imp $\beta$</sup> :Arg42<sup>Rev</sup> and Asp288<sup>Imp $\beta$</sup> :Arg46<sup>Rev</sup> and combined these with BS3 crosslinking distance restraints for Rev bound to the N-site (experiment 1) or C-site (experiment 2) (**Table S2a**). Both simulations yielded similar scoring statistics (e.g., HADDOCK score, cluster size, buried surface area) for the top-ranked cluster of solutions (**Table S2b**). These solutions positioned Rev on the inner surface of Imp $\beta$  next to HEAT repeats 1-8 (experiment 1) or repeats 7-19 (experiment 2), with Rev helix  $\alpha 2$  oriented roughly antiparallel or parallel, respectively, to the Imp $\beta$  superhelical axis (**Figure S5a,b**). (We refer hereafter to these two generic Rev orientations as "antiparallel" or "parallel", respectively). In both experiments the majority of docking solutions closely resembled the top-ranked solution with only minor variations in Rev orientation, indicating a relatively limited region of configurational space consistent with the docking parameters used (**Figure S6a,b**).

The above experiments included only two of the eight possible distance restraints suggested by our mutagenesis data (**Figure 9h**), and in particular omitted the distance restraint between residues Glu437<sup>Imp $\beta$</sup>  and Arg48<sup>Rev</sup>. Strikingly, however, experiment 2 (with Rev in the C-site) yielded solutions in which these two residues were relatively close to each other, including the 2<sup>nd</sup> ranked solution which positioned these residues <5 Å apart (**Figure S5b**). In contrast all solutions from experiment 1 (with Rev in the N-site) placed these residues far apart and sterically inaccessible to each other (**Figure S5a**). Repeating these simulations with the Glu437<sup>Imp $\beta$</sup> :Arg48<sup>Rev</sup> interaction explicitly included as an additional distance restraint yielded significantly worse docking results for Rev bound to the N-site (experiment 3) and considerably improved results for Rev bound to the C-site (experiment 4) (**Figures S5c,d** and **S6c,d** and **Table S2**). These findings suggest that the set of electrostatic interactions used as distance restraints in experiments 3 and 4 are more compatible with the C-site than with the N-site (**Figure S5e**).

To confirm this hypothesis we performed exhaustive rigid-body sampling of Rev binding orientations on the surface of Imp $\beta$  within the N-site and C-site envelopes depicted in **Figure 6f**. The Imp $\beta$  structure was held fixed while the Rev helical hairpin was rotated and translated in a full 6-dimensional search that maintained Lys20<sup>Rev</sup> within BS3 crosslinking distance of the Group-1 lysines in HEAT repeats 1 and 2 (in the case of the N-site) or in repeat 19 (in the case of the C-site), yielding >3.5 and >2.8 million configurations, respectively. After

excluding configurations with a severe steric overlap between Imp $\beta$  and Rev, the remaining configurations were used to measure C $\beta$ -C $\beta$  distances between specific Imp $\beta$  and Rev residues. These measurements showed that the putative interactions illustrated in **Figure 9h** are individually compatible with Rev bound to either the N- or C-site, since docking configurations were identified for both sites that brought the relevant charged residues within salt-bridge distance of each other (**Figure S7a**). However, no configurations were identified for the N-site in which interactions involving residue pairs Arg42<sup>Rev</sup>:Asp288<sup>Imp $\beta$</sup>  and Arg48<sup>Rev</sup>:Glu437<sup>Imp $\beta$</sup>  could simultaneously occur (i.e., configurations in which both C $\beta$ -C $\beta$  distances were <14 Å), unlike the case for the C-site, where >80 such configurations were identified (**Figure S7b**). These findings confirm that the putative interactions depicted in **Figure 9h** have a much greater probability of being associated with the C-site than with the N-site.

In addition, the rigid-body sampling analysis also shed light on two of the BS3 crosslinks (between Lys20<sup>Rev</sup> and Lys206<sup>Imp $\beta$</sup>  or Lys537<sup>Imp $\beta$</sup> ) that we previously were unable to assign reliably to either the N- or C-site. The minimal C $\beta$ -C $\beta$  distance measured between residues Lys20<sup>Rev</sup> and Lys206<sup>Imp $\beta$</sup>  was 30.1 Å for all C-site configurations, compared to 12.5 Å for N-site configurations (**Figure S7a**), thereby assigning this crosslink with high probability to the N-site. Among the ~48,000 N-site configurations compatible with a Lys20<sup>Rev</sup>:Lys206<sup>Imp $\beta$</sup>  crosslink, only ~670 were compatible with a long crosslink between Lys20<sup>Rev</sup> and Lys537<sup>Imp $\beta$</sup>  (C $\beta$ -C $\beta$  distance between 28.9 and 30 Å) and none with a shorter crosslink (C $\beta$ -C $\beta$  distance <28.9 Å) (**Figure S7c**). In contrast the minimal C $\beta$ -C $\beta$  distance for this residue pair was 13.7 Å for C-site configurations (**Figure S7a**), making it highly likely that the Lys20<sup>Rev</sup>:Lys537<sup>Imp $\beta$</sup>  crosslink is associated with the C-site.

### Structural model of Rev bound to the Imp $\beta$ C-site

We next filtered the results of our rigid-body docking experiment for configurations of Rev bound to the Imp $\beta$  C-site that were compatible with our BS3 crosslinking and compensatory mutagenesis data (**Figure 10a**). This resulted in a highly uniform set of parallel Rev configurations (**Figure 10b** and **Table S3**). To confirm this result, we ran HADDOCK using the BS3 crosslinking and compensatory mutagenesis data as interaction restraints to guide the docking procedure. Nearly all (97%) of the solutions obtained in the final refinement stage of docking yielded parallel configurations belonging to 7 very similar clusters (**Figure 10c** and **Table S4**) that closely resembled the configurations obtained by rigid body docking (**Figure 10d**). As expected, both docking approaches yielded models that agreed well with our BS3 crosslinking data (**Figure S8a**) and placed residues related by compensatory charge-reversal effects in close proximity (**Figure S8b**). To represent the entire ensemble of configurations obtained by rigid-body sampling and HADDOCK we calculated an "average" configuration that minimizes the change in orientation and position relative to each of the individual docking solutions obtained (**Figure 10e**). The resulting model closely resembles the top-ranked configurations obtained by rigid-body sampling and by HADDOCK (**Figure S9**). Comparing the individual docking configurations to the average model shows that the predicted location (i.e., translational coordinates of the centroid) of Rev on Imp $\beta$  (**Figure 10e**, lower inset) is relatively well defined, as are two of the rotational angles (yaw and pitch), whereas the angle about the long axis of Rev (roll angle) is somewhat more variable. A SAXS curve calculated from the average model

agreed reasonably well ( $\chi^2=1.93$ ) with the SAXS data measured from the Imp $\beta$ /Rev<sup>OD</sup> $\Delta$  complex (**Figure S10a**). A near-perfect match between the calculated and observed scattering ( $\chi^2=0.87$ ) was obtained using a slightly more elongated conformation of Imp $\beta$ , obtained by normal mode perturbation along the lowest-frequency vibrational mode (**Figure S10b,c**). Overall, these findings support a general binding mode whereby the Rev helical hairpin is embraced by the C-terminal half of Imp $\beta$  with the long axis of Rev roughly parallel to the Imp $\beta$  superhelical axis and the Rev CTD positioned near the C-terminal end of the HEAT-repeat superhelix.

### Implications for Rev bound at the Imp $\beta$ N-site

We next wondered how the second Rev monomer might bind to Imp $\beta$ . Since Rev is known to multimerize through homotypic "A-A" and "B-B" interactions, we structurally aligned both types of Rev homodimer with our average model of Rev bound to the Imp $\beta$  C-site to see whether either dimer was compatible with the model (**Figure S11a,b**). Both alignments resulted in an implausible placement of the second Rev monomer: residue Lys20 on Rev helix  $\alpha 1$  was very far from Group-1 lysines in HEAT repeats 1 and 2, in disagreement with the BS3 crosslinking data; there was insufficient space to accommodate the Rev CTD; and, in the case of the Rev B-B homodimer, a severe steric clash occurred with Imp $\beta$  (**Figure S11b**). These findings make it highly unlikely that the second Rev monomer binds Imp $\beta$  by forming an A-A or B-B interface with the first bound Rev monomer. This conclusion is strongly supported by the ability of Imp $\beta$  to bind two monomers of the Rev<sup>OD</sup> mutant (**Figures 1f, 2b-d and 3b**), whose ability to form A-A and B-B dimers is compromised (**Figure 1c**).

For additional insights we further exploited our rigid-body docking data. We structurally aligned the average model of Rev bound to the Imp $\beta$  C-site with all Rev docking configurations that were compatible with BS3 crosslinks involving the N-site (including the K20<sup>Rev</sup>-K206<sup>Imp $\beta$</sup>  crosslink;  $\sim 48,000$  configurations; **Figure S7c**) and retained those exhibiting no, or at most only a mild, steric overlap between the two Rev monomers ( $\sim 18,000$  configurations). As expected, the resulting Rev monomers all localize to the N-terminal half of Imp $\beta$ , with approximately one-third located within contact distance of the Rev monomer bound at the C-site (**Figure S11c**). The latter subset is characterized by two predominant configurations in which the two Rev monomers interact through their  $\alpha 1$ - $\alpha 2$  loops, with the second Rev monomer adopting either an anti-parallel or a roughly perpendicular ("transverse") orientation (**Figure S11d**). Interestingly, in the latter case, the relative orientation of the two Rev monomers closely resembles the C-C homodimer arrangement recently described for Rev<sup>67</sup>. Indeed, aligning the structure of a Rev C-C homodimer (PDB 5DHV) with our average model of Rev bound to the C-site yields only a minor steric clash with Imp $\beta$  that can be relieved by a small rigid-body rotation of the dimer (**Figure S11e**), suggesting that Imp $\beta$  could plausibly bind two Rev monomers sharing a C-C interface. However, additional data are required to establish the specific binding configuration of the second Rev monomer and whether it interacts with the first.

## DISCUSSION

In this study we investigated the interaction of Imp $\beta$  with HIV-1 Rev using diverse experimental and computational approaches. Gel shift and native MS experiments show that Imp $\beta$  can bind either one or two Rev monomers, with ITC measurements reporting an approximately 10-fold difference in binding affinity between the two monomers. Crosslinking/MS data reveal that the two Rev binding sites localize to N- and C-terminal regions (denoted the "N-site" and "C-site") of the HEAT-repeat superhelix, which according to SAXS data adopts an extended conformation upon binding Rev. ITC and NMR analyses indicate that Imp $\beta$  primarily recognizes the helical hairpin domain of Rev, while peptide scanning and mutagenesis results identify the N-terminal tip of Rev helix  $\alpha 2$  and preceding loop, constituting the first half of the ARM, as a key binding epitope. Charge-reversal (Arg $\rightarrow$ Asp) mutations made in this region impair the ability of Rev to displace a Rev-NLS peptide from Imp $\beta$ , and this effect is countered by converse (Asp/Glu $\rightarrow$ Arg) point mutations on Imp $\beta$ , suggesting close spatial proximity of the mutated Imp $\beta$  and Rev residues. Molecular docking simulations informed by the above data suggest a specific structural model for Rev bound at the C-site of Imp $\beta$  and provide hints about the possible binding mode of Rev at the N-site.

Imp $\beta$  is conformationally highly flexible, allowing it to adapt to and recognize diverse cargos through different regions of its HEAT repeat array. Whereas a C-terminal Imp $\beta$  region (approximately repeats 7-19) recognizes the IBB domains of Imp $\alpha$ <sup>48</sup> and Snurportin1<sup>61</sup> and the DNA-binding domain of SREBP-2<sup>59</sup>, a middle region (repeats 5-14) recognizes Snail1, and an N-terminal region (approximately repeats 1-11) recognizes cyclin B1<sup>100</sup>, ribosomal protein L23<sup>101</sup>, and the parathyroid hormone-related protein PTHrP<sup>58</sup>. The *in vitro* observation that cyclin B1 and the IBB domain of Imp $\alpha$  can both bind to the same Imp $\beta$  molecule demonstrates that Imp $\beta$  can use distinct N- and C-terminal regions to bind two molecular cargos simultaneously<sup>100</sup>. Our finding that Imp $\beta$  contains two Rev binding sites involving opposite ends of the HEAT-repeat superhelix is consistent with this observation and agrees with a study reporting that Rev interacts with both an N-terminal (res. 1-396) and a C-terminal (res. 304-876) fragment of Imp $\beta$ <sup>44</sup>. Interestingly, the alternative Rev import receptor Transportin also contains two independent Rev binding sites<sup>44</sup>. Conceivably, the ability of these import receptors to bind two Rev molecules might accelerate the nuclear import rate of Rev or increase its half-life in the cell<sup>102</sup>, which could potentially modulate nuclear or cytosolic functions of Rev.

The ability of Imp $\beta$  to engage two Rev monomers is in striking contrast with previously reported structures of Imp $\beta$ /cargo complexes. These show Imp $\beta$  loaded with only a single copy of its cargo<sup>48,58,61,63</sup>, except for SREBP-2, which binds Imp $\beta$  as a pre-formed dimer<sup>59</sup>. Unlike SREBP-2, the independent binding of Rev monomers revealed by gel shift and ITC analysis show that Imp $\beta$  does not associate with a pre-formed Rev dimer but binds one Rev molecule at a time, reminiscent of how the RRE binds Rev<sup>65,90</sup>. Our structural model of Rev bound at the C-site of Imp $\beta$  overlaps sterically with that of RanGTP bound to the N-terminal half of Imp $\beta$  (**Figure S12a**; presumably a Rev monomer bound at the N-site would also strongly overlap with RanGTP), accounting for the ability of RanGTP to compete with Rev for binding to Imp $\beta$ <sup>43,44</sup>. Previous studies identified residues within the ARM of Rev (res. 35-50) as important for binding Imp $\beta$ <sup>42-44</sup>. Our mutagenesis and peptide-scanning experiments are consistent with

these reports and further delineate the first half of the ARM (res. 35-41) as being particularly important for binding affinity. These residues mediate key interactions with stem IIB and with an adjacent site on the RRE<sup>70,74</sup> as well as with stem IA<sup>88</sup>, explaining why Imp $\beta$  and the RRE bind Rev in a mutually exclusive fashion<sup>42,43,103</sup>. Our compensatory mutagenesis experiments identify four acidic residues of Imp $\beta$  (Asp288, Glu289, Glu299 and Glu437) as being potentially in direct contact with the Rev ARM. Subsets of these residues also mediate recognition of the Imp $\alpha$  IBB domain (Asp288), SREBP-2 (Glu299, Glu437) and Snail1 (Asp288, Glu289, Glu437), suggesting that Rev exploits the same Imp $\beta$  residues used to import cellular cargos.

Among the structurally characterized Imp $\beta$ /cargo complexes, the predicted binding mode of Rev at the C-site most closely resembles that of the Imp $\alpha$  IBB domain (**Figure S12b**). The long C-terminal helix of the IBB domain adopts a similar parallel orientation as that predicted for Rev helix  $\alpha$ 2 but is shifted by 25 Å towards the C-terminal HEAT repeats, where it makes salt bridge interactions with the B helices of repeats 12-18. Besides its C-terminal helix, the IBB also contains an N-terminal extended moiety that makes extensive van der Waals and hydrogen-bonding interactions with the B helices of HEAT repeats 7-11. N-terminal truncations that remove one or both of the highly conserved Arg13 and Lys18 residues in this moiety severely abrogate binding to Imp $\beta$ <sup>104,105</sup>. The Arg residues at the tip of Rev helix  $\alpha$ 2 in our structural model overlap closely with the N-terminal IBB moiety (**Figure S12c**), accounting for the ability of the IBB domain to compete with Rev for binding to Imp $\beta$ <sup>43</sup> and raising the possibility that key basic residues in these two molecular cargos mediate similar interactions with Imp $\beta$ .

Rev is known to multimerize through hydrophobic A-A and B-B interfaces<sup>69,73,85,106</sup>, which above a critical Rev concentration (~6  $\mu$ M) mediate the *in vitro* assembly of helical filaments<sup>84,107-109</sup>. Our molecular docking simulations and the observation that Imp $\beta$  binds two monomers of the oligomerization-defective Rev<sup>OD</sup> mutant argue against the formation of an A-A or B-B interface between the two Imp $\beta$ -bound Rev monomers. Interestingly, however, our data are compatible with the two bound Rev monomers sharing a weaker C-C interface, previously observed in Rev filaments and in crystallization contacts<sup>67,68</sup>. In the Rev-RRE assembly pathway, a C-C interaction between two RRE-bound Rev dimers has been proposed to mediate a "four-Rev" specificity checkpoint that precedes the association of additional Rev molecules<sup>67,110</sup>. This raises the speculative possibility that a C-C interface mediating recruitment of the second Rev monomer to Imp $\beta$  might compete with the checkpoint C-C interaction and potentially regulate Rev-RRE assembly/disassembly.

In conclusion, our findings reveal that the interaction of Rev with Imp $\beta$  is unlike that of cellular Imp $\beta$  cargos in that it can interact through two independent binding sites that localize to the N- and C-terminal halves of the import receptor. Additional studies are needed to uncover the atomic details underlying Rev recognition by Imp $\beta$  and the functional implications of the atypical binding stoichiometry.

## METHODS

### Protein expression and purification

**Imp $\beta$ .** N-terminally His-tagged Imp $\beta$  was expressed from a pETM-11 based plasmid in *E. coli* strain BL21 (DE3). Cells were grown in LB medium containing kanamycin (50  $\mu$ g/ml) at 37°C until an OD<sub>600</sub> of 0.5 - 0.6, and protein

expression was induced with 0.5 mM IPTG for 5 h at 30°C. Harvested cells were lysed by sonication at 4°C in lysis buffer [50 mM HEPES pH 7.5, 150 mM NaCl, 10 mM imidazole, 10 mM MgCl<sub>2</sub>, 2 mM β-mercaptoethanol (BME)] supplemented with nuclease and protease inhibitors [10 μg/ml DNase I, 10 μg/ml RNase A, 2 mM PMSF and 1 tablet/80 ml of complete EDTA-free protease inhibitor cocktail (Roche)]. The soluble fraction was recovered by centrifugation (50,000 g, 20 min, 4°C) and applied to a HisTrap FF NiNTA column (GE Healthcare). After washing with buffer A (50 mM HEPES pH 7.5, 200 mM NaCl, 2 mM BME) containing 40 mM imidazole, proteins were eluted in the same buffer containing 300 mM imidazole. For untagged Impβ the His-tag was then removed by overnight incubation with His-tagged TEV protease (1:20 w/w TEV/Impβ protein ratio) supplemented with 2 mM BME and 2 mM PMSF and recovered in the flow-through of a new NiNTA column. Both untagged and His-tagged Impβ were further purified using a Superdex 200 16/60 gel filtration column (GE Healthcare) in 50 mM HEPES pH 7.5, 100 mM NaCl, 1 mM tris(2-carboxyethyl)phosphine (TCEP). Fractions containing pure Impβ were pooled, concentrated on an Amicon centrifugal filter (30 kDa cutoff, Millipore) and stored as aliquots at -80°C. The Impβ protein concentration was determined using a molar extinction coefficient of 79,051 M<sup>-1</sup>cm<sup>-1</sup>, which was experimentally determined by quantitative amino acid analysis.

Impβ charge reversal point mutations were generated by a PCR-based protocol adapted from the QuikChange site-directed mutagenesis method (Agilent Technologies). Impβ mutant proteins were expressed and purified as the WT and their molecular masses verified by LC/ESI mass spectrometry (**Table S5**).

**HIV-1 Rev.** Rev proteins were expressed from a pET-28a based plasmid as an N-terminal His-GB1-TEV fusion as previously described<sup>111</sup>. Protein expression was obtained from *E. coli* BL21 (DE3) cells grown in Auto-Induction Medium<sup>112</sup> containing kanamycin (50 μg/mL) for 12 h at 27°C. Harvested cells were lysed by sonication at 4°C, in lysis buffer (25 mM HEPES pH 7.5, 200 mM NaCl, 100 mM Na<sub>2</sub>SO<sub>4</sub>, 10 mM MgCl<sub>2</sub>, 10 mM imidazole, 0.1 % Tween 20) containing nuclease and protease inhibitors (as described above for Impβ). The clarified lysate was incubated with RNase T1 (20 U/μL, Roche), RNase A (20 μg/ml, Euromedex) and 2 M NaCl for 1.5 h at room temperature. After centrifugation (50,000 g, 10 min, 4°C), the soluble fraction was applied to a HisTrap FF NiNTA column (GE Healthcare) and washed first with high-salt buffer B (2 M NaCl, 50 mM Tris pH 8, 0.1 % Tween 20, 2 mM BME and 10 mM imidazole) followed by low-salt buffer B (including 250 mM NaCl and no Tween 20) containing 40 mM imidazole. Proteins were eluted in buffer B containing 300 mM imidazole, and diluted with an equal volume of 50 mM Tris pH 8 before loading onto HiTrap Heparin HP columns (GE Healthcare). After extensive washing with 50 mM Tris pH 8, 125 mM NaCl, elution was performed using 50 % High Salt Buffer (HSB) (50 mM Tris pH 8, 200 mM NaCl, 400 mM (NH<sub>4</sub>)<sub>2</sub>SO<sub>4</sub>, 100 mM Na<sub>2</sub>SO<sub>4</sub>, 2 mM BME) and 50 % of 2 M NaCl. The His-GB1 tag was then removed from the Rev protein by an overnight incubation with His-tagged TEV protease (1:20 w/w TEV/Rev protein ratio) supplemented with 2 mM BME and 2 mM PMSF. The untagged Rev protein recovered in the flow-through after passing the sample through a new NiNTA column, was then diluted with 5 volumes of 50 mM Tris pH 8 and then concentrated by repeating the heparin chromatography step described above. Heparin elution fractions containing Rev were applied onto a Superdex 75 16/60 gel filtration column (GE Healthcare) in HSB



containing 1 mM TCEP. Fractions containing pure Rev were pooled, concentrated on an Amicon centrifugal filter (10 kDa cutoff, Millipore) and stored at -80°C. Rev protein concentration was determined using a molar extinction coefficient of 9476 M<sup>-1</sup>cm<sup>-1</sup>, which was experimentally determined by quantitative amino acid analysis.

Rev<sup>OD</sup>Δ (Rev4-69 V16D I55N) and Rev charge-reversal point mutations were generated by a PCR-based protocol adapted from the QuikChange site-directed mutagenesis method (Agilent Technologies). Rev mutant proteins were expressed and purified as the WT and their molecular masses verified by LC/ESI mass spectrometry (Table S5).

**<sup>15</sup>N, <sup>13</sup>C-labeled Rev<sup>OD</sup> protein.** *E. coli* BL21 (DE3) cells expressing Rev<sup>OD</sup> were grown in M9/H<sub>2</sub>O medium containing 10 g/L Na<sub>2</sub>HPO<sub>4</sub>·7H<sub>2</sub>O, 3 g/L KH<sub>2</sub>PO<sub>4</sub>, 0.5 g/L NaCl, 1 g/L <sup>15</sup>NH<sub>4</sub>Cl, 2 g/L <sup>13</sup>C D-glucose, 1 mM MgSO<sub>4</sub>, 0.1 mM CaCl<sub>2</sub>, 0.01 mM MnCl<sub>2</sub>, 0.05 mM ZnSO<sub>4</sub>, 1X MEM vitamin solution (ThermoFisher Scientific) and kanamycin (50 µg/ml). Precultures were started from a glycerol stock in LB + kanamycin, 180 rpm, 37 °C. After 8 h, cells were collected for 15 min at 3,000 rpm and inoculated in M9/<sup>15</sup>N/<sup>13</sup>C medium and grown overnight at 37 °C. The following day, precultures were inoculated in M9/<sup>15</sup>N/<sup>13</sup>C medium (1:35) + kanamycin and grown at 37 °C until OD<sub>600</sub> reach 0.7. Protein induction was obtained by adding 1 mM IPTG and growing the culture overnight at 16 °C. Cells were harvested by centrifugation and resuspended in denaturing lysis buffer (8 M urea, 50 mM NaH<sub>2</sub>PO<sub>4</sub>/Na<sub>2</sub>HPO<sub>4</sub> pH 7.4, 500 mM NaCl, 5 mM β-mercaptoethanol, 0.02 % NaN<sub>3</sub>, 25 mM imidazole) supplemented with 1 mM PMSF and one tablet of complete EDTA free (Roche). After sonication at 4°C, lysed cells were centrifuged at 50,000 g, 4 °C for 30 min. The supernatant containing <sup>15</sup>N, <sup>13</sup>C-labeled His-GFP-TEV-Rev<sup>OD</sup> denatured protein was loaded on His Trap FF nickel column. After washing with denaturing lysis buffer at 5 ml/min, the flow rate was decreased to 1 ml/min and Rev refolding obtained by applying a linear gradient from 100 % lysis buffer to 100 % refolding buffer (50 mM NaH<sub>2</sub>PO<sub>4</sub>/Na<sub>2</sub>HPO<sub>4</sub> pH 7.4, 500 mM NaCl, 5 mM β-mercaptoethanol, 0.02 % NaN<sub>3</sub>). After an additional wash of refolding buffer, refolded protein was eluted with elution buffer (50 mM NaH<sub>2</sub>PO<sub>4</sub>/Na<sub>2</sub>HPO<sub>4</sub> pH 7.4, 500mM NaCl, 5mM β-mercaptoethanol, 0.02 % azide, 500 mM imidazole). The His-GFP-TEV fusion was then removed from the Rev<sup>OD</sup> protein using His-tagged TEV protease (1:20 w/w TEV:Rev protein ratio), by overnight incubation at 4 °C in dialysis buffer (50 mM NaH<sub>2</sub>PO<sub>4</sub>/Na<sub>2</sub>HPO<sub>4</sub> pH 7.4, 150 mM KCl, 1 mM DTT, 1 mM EDTA, 0.02 % NaN<sub>3</sub>) using 10 kDa cutoff dialysis membrane. The untagged <sup>15</sup>N, <sup>13</sup>C-labeled Rev<sup>OD</sup> protein was recovered in the flow-through after passing the sample through a new His Trap FF column, centrifugated (50,000 g, 30 min, 4 °C) and concentrated by ultrafiltration (Amicon, 10 kDa cutoff,) before further purifying on a Superdex S75 16/60 gel filtration column (GE Healthcare) in 25 mM NaH<sub>2</sub>PO<sub>4</sub>/Na<sub>2</sub>HPO<sub>4</sub> pH 7.4, 150 mM KCl, 1 mM DTT, 1 mM EDTA, 0.02 % NaN<sub>3</sub>. The Rev<sup>OD</sup> protein was dissolved in 90 % H<sub>2</sub>O/10 % D<sub>2</sub>O with gel filtration buffer and the protein concentration was adjusted to 90 µM in 150 µL in the absence or presence of Impβ (at equimolar ratio)

**TEV protease.** N-terminally His-tagged TEV protease bearing the point mutation S219V was expressed and purified as previously described<sup>111</sup>.

## SEC/MALLS

SEC was performed on a high-pressure liquid chromatography system equipped with an LC-20AD pump, an autosampler SIL20-ACHT storing the samples at 4°C, a communication interface CBM-20A (Shimadzu, Kyoto, Japan), using a Superdex 75 10/300 GL column (GE Healthcare Bio-Sciences AB, Uppsala, Sweden), thermostated at 20°C in an oven XL-Therm (WynSep, Sainte Foy d'Aigrefeuille, France), and equilibrated with 200 mM NaCl, 400 mM (NH<sub>4</sub>)<sub>2</sub>SO<sub>4</sub>, 100 mM Na<sub>2</sub>SO<sub>4</sub>, 50 mM Tris pH 8 and 1 mM Tris(2-carboxyethyl)phosphine hydrochloride (TCEP). Volumes of 50 µl of each sample (60 - 710 µM) were injected at a flow rate of 0.5 ml/min. The elution profiles were followed on-line at 280 nm (SPD-M20A Shimadzu) by refractive index, static and dynamic light scattering using a laser emitting at 658 nm (Optilab rEX, miniDAWN TREOS and Dynapro Nanostar detectors, respectively, Wyatt Technology, Santa-Barbara, USA). Data were analysed using ASTRA V 5.3.4.20 software (Wyatt Technology). The basic equation for light scattering, restricted to diluted solutions of small particles (< 20 nm), reduces to  $I = KcM \times (\partial n/\partial c)^2$ , where  $I$  is the excess intensity of scattered light,  $K$  is an optical parameter,  $c$  is the weight concentration, and  $\partial n/\partial c$  is the refractive index increment. The concentration was evaluated on-line from the refractive index signal, combined, for two-component analysis, with the 280 nm absorbance. From the amino acid composition and using Sedfit (<https://sedfitsedphat.nibib.nih.gov/>), we obtained  $\partial n/\partial c$  of 0.184 mL g<sup>-1</sup> and extinction coefficients of 0.647 L g<sup>-1</sup> cm<sup>-1</sup>.

## Differential scanning fluorimetry

HIV-1 consensus B Rev (15-mer) peptides were obtained from NIH AIDS Research and Reference Reagent Program (Cat.# 6445). Peptides were dissolved at 5 mM in water or 1-80 % DMSO, as recommended. DSF experiments were performed on a CFX96 touch real-time PCR detection system (Bio-Rad) using 0.2 ml 8-tube PCR strips (#TBS0201) and optical Flat 8-cap strips (#TCS0803). Assay samples were done over a temperature range starting from 20 °C up to 100 °C, in increments of 0.5 °C, with 15 µM Impβ mixed with 75 µM Rev-peptide and 1x SYPRO Orange (Molecular Probes) diluted in H<sub>2</sub>O. The melting temperature ( $T_m$ ) values of Impβ in presence of each Rev-peptide were determined from the fluorescence first derivative of the melting curves using CFX Maestro software. The wavelengths used for SYPRO Orange excitation and emission were 470 nm and 570 nm, respectively.

## Native gel shift assay

Impβ and Rev proteins were initially diluted in phosphate buffered saline (PBS) to 25 µM, and incubated in a 1:1 to 1:5 Impβ:Rev ratio (3.7 µM Impβ, 10 µL final volume) for 5 min. After adding 1 µL of native loading buffer (62.8 mM Tris HCl pH 6.8, 40 % glycerol, 0.01 % bromophenol blue), 2.5 µL of samples were analysed on a 10 % TGX (Biorad) gel, run under native conditions (0.5X TBE buffer, 4°C, 100 V, 120 min). Gels were stained with Coomassie blue and scanned on a ChemiDoc MP gel imaging system (Biorad).

### **Isothermal titration calorimetry**

Calorimetric experiments were performed on a MicroCal iTC200 calorimeter (GE Healthcare, PA) at 20 °C while stirring at 800 rpm. All proteins were buffer exchanged by dialysis into 50 mM HEPES pH 7.5, 200 mM NaCl. Typically, 35-50  $\mu\text{M}$  Rev<sup>OD</sup> or Rev<sup>OD</sup> $\Delta$  and 100-130  $\mu\text{M}$  Imp $\beta$  proteins were placed in the cell and syringe, respectively. Titrations consisted of 26 identical injections of 1.5  $\mu\text{l}$  made at time intervals of 3 min. ITC data were analysed with NITPIC, SEDPHAT and GUSI public-domain software packages<sup>113</sup> using a single or two binding site models. The first data point was excluded from the analysis. Experiments were done at least in duplicates, and the variability was estimated to be less than 5% in the binding enthalpy and 10% in both the binding affinity and the number of sites.

### **Glutaraldehyde crosslinking**

5  $\mu\text{M}$  Imp $\beta$  was mixed with 0-20  $\mu\text{M}$  Rev in 50 mM HEPES pH 7.5, 100 mM NaCl. Subsequently, 0.004% (v/v) of glutaraldehyde (Sigma, ref. G7776) was added and the reaction was incubated for 5 min at RT. The crosslinking reaction was stopped by adding 90 mM Tris pH 8 and the mixture analysed by native and denaturing gel electrophoresis and mass spectrometry.

### **Mass spectrometry**

#### *Liquid Chromatography/Electrospray Ionization Mass Spectrometry (LC/ESI-MS)*

LC/ESI-MS was performed on a 6210 LC-TOF spectrometer coupled to an HPLC system (Agilent Technologies). All solvents used were HPLC grade (Chromasolv, Sigma-Aldrich). Trifluoroacetic acid (TFA) was from Acros Organics (puriss., p.a.). Solvent A was 0.03 % TFA in water; solvent B was 95 % acetonitrile-5 % water-0.03 % TFA. Immediately before analysis, protein samples were diluted to a final concentration of 5  $\mu\text{M}$  with solvent A and then desalted on a reverse phase-C8 cartridge (Zorbax 300SB-C8, 5  $\mu\text{m}$ , 300  $\mu\text{m}$  ID 5 mm, Agilent Technologies) at a flow rate of 50  $\mu\text{l}/\text{min}$  for 3 min with 100 % solvent A and subsequently eluted with 70 % solvent B for MS detection. MS acquisition was carried out in the positive ion mode in the 300-3200  $m/z$  range. MS spectra were acquired and the data processed with MassHunter workstation software (v. B.07.00, Agilent Technologies) and with GPMW software (v. 7.00b2, Lighthouse Data, Denmark).

#### *Matrix-Assisted Laser Desorption/Ionisation-Time-of-Flight Mass Spectrometry (MALDI-TOF MS)*

MALDI-TOF mass spectra were measured with an Autoflex mass spectrometer (Bruker Daltonics, Bremen, Germany) operated in linear positive ion mode. External mass calibration of the instrument, for the  $m/z$  range of interest, was carried out using the monomeric (66.4 kDa) and dimeric (132.8 kDa) molecular ions of BSA (reference 7030, Sigma Aldrich) as calibrants. Before MS analysis the protein samples (concentration around 10  $\mu\text{M}$ ; before and after crosslinking) were submitted to buffer exchange against 20 mM Tris pH 7.5, 50 mM NaCl, using Vivaspin devices (Sartorius, cut-off of 30 kDa for Imp $\beta$  alone and 10 kDa for Imp $\beta$ /Rev). The buffer-

exchanged protein samples were then mixed in a 1:2, 1:5 or 1:10 (v/v) ratio with sinapinic acid matrix (Sigma; 10 mg/mL in water/acetonitrile/trifluoroacetic acid, 50/50/0.1, v/v/v) and 1 to 2  $\mu$ L were deposited on the target and allowed to air dry at RT. Mass spectra data were processed with Flexanalysis software (v.3.0, Bruker Daltonics).

### *Native Mass Spectrometry*

Imp $\beta$  and Rev proteins were individually buffer exchanged by gel filtration using a Superdex200 5/150 (Imp $\beta$ ) or Superdex75 5/150 (Rev) column pre-equilibrated with either 250 mM (Imp $\beta$ ), 400 mM (Rev<sup>OD</sup> and Rev<sup>OD</sup> $\Delta$ ) or 800 mM (Rev WT) ammonium acetate. The individual proteins or mixtures of Imp $\beta$  with Rev were incubated at 20°C for 15 min prior to MS analysis. Protein ions were generated using a nanoflow electrospray (nano-ESI) source. Nanoflow platinum-coated borosilicate electrospray capillaries were bought from Thermo Electron SAS (Courtaboeuf, France). MS analyses were carried out on a quadrupole time-of-flight mass spectrometer (Q-TOF Ultima, Waters Corporation, Manchester, U.K.) modified for the detection of high masses<sup>114-116</sup>. The following instrumental parameters were used: capillary voltage = 1.2-1.3 kV, cone potential = 40 V, RF lens-1 potential = 40 V, RF lens-2 potential = 1 V, aperture-1 potential = 0 V, collision energy = 30-140 V, and microchannel plate (MCP) = 1900 V. All mass spectra were calibrated externally using a solution of cesium iodide (6 mg/mL in 50% isopropanol) and processed with the Masslynx 4.0 software (Waters Corporation, Manchester, U.K.) and Massign software package<sup>117</sup>.

### **LC-MS/MS analysis and BS3 crosslink identification**

4.1  $\mu$ M of His-tagged Imp $\beta$  was mixed with 8.2  $\mu$ M of WT Rev in 50 mM HEPES pH 7.5, 150 mM NaCl before adding 25  $\mu$ M of bis(sulfosuccinimidyl)suberate (BS3) (Thermo Fisher, ref. 21580). The reaction was incubated for 30 min at room temperature and stopped with 25 mM NH<sub>4</sub>HCO<sub>3</sub>. The reaction mixture was then subjected to SDS-PAGE and the band corresponding to the crosslinked complex was excised from the Coomassie-stained gel. Disulfide bridges were reduced using dithiothreitol (Roche). Free thiol groups were subsequently alkylated with iodoacetamide. Proteins were digested with trypsin (Promega) at 37°C overnight. Reactions were stopped with formic acid (FA) and peptides were extracted from the gel with 5% formic acid (FA) in 50% acetonitrile. Acetonitrile content was reduced in a vacuum centrifuge prior to LC-MS/MS analysis. Peptides were analysed on an UltiMate 3000 HPLC RSLC nano system coupled to a Q Exactive HF-X quadrupole-orbitrap mass spectrometer, equipped with a Nanospray Flex ion source (all Thermo Fisher Scientific). Peptides were trapped on a PepMap C18 cartridge (5 mm  $\times$  300  $\mu$ m ID, 5  $\mu$ m particles, 100 Å pore size) and separated on a PepMap C18 column (500 mm  $\times$  75  $\mu$ m ID, 2  $\mu$ m, both Thermo Fisher Scientific) applying a linear gradient from 2% to 35% solvent B (80% acetonitrile, 0.08% FA; solvent A 0.1% FA) at a flow rate of 230 nL/min over 120 min. The mass spectrometer was operated in data-dependent mode: survey scans were obtained in a mass range of 350-1600 m/z with lock mass on, at a resolution of 60,000 at 200 m/z and an AGC target value of 3E6. The 10 most intense ions were collected subsequently with an isolation width of 1.6 Th for maximal 250 ms, and fragmented at 28% normalized collision

energy. Spectra were recorded at a target value of 2E4 and a resolution of 60,000. Peptides with a charge of +1,+2 or >+7 were excluded from fragmentation, the peptide match feature was set to preferred, the exclude isotope feature was enabled, and selected precursors were dynamically excluded from repeated sampling for 20 seconds within a mass tolerance of 5 ppm. Raw data were searched with pLink 2.3.5<sup>118</sup> against the sequences of the 16 most abundant protein hits from the MaxQuant search (version 1.6.0.16)<sup>119</sup>, as well as the sequences of target proteins and common contaminant sequences. BS3 was selected as the crosslinking chemistry. Carbamidomethyl on Cys was set as fixed, oxidation of Met and protein N-terminal acetylation as variable modifications. Enzyme specificity was selected according to the protease used for digestion. Search results were filtered for 1% FDR on the PSM level limiting the precursor mass deviation to 5 ppm. To remove low quality peptide spectrum matches an additional e-Value cutoff of < 0.001 was applied.

## **NMR**

Assignment was obtained using <sup>15</sup>N,<sup>13</sup>C-labeled samples (90 μM) using BEST-TROSY three-dimensional experiments HNCO, intra-residue HN(CA)CO, HN(CO)CA, intra-residue HNCA, HN(COCA)CB, and intra-residue HN(CA)CB<sup>120</sup> recorded on a Bruker spectrometer equipped with a cryoprobe operating at 20 °C and a <sup>1</sup>H frequency of 600 and 700 MHz. Spectra were processed using NMRPipe<sup>121</sup> and analyzed in Sparky (Goddard, T. & Kneller, D. SPARKY 3. University of California, San Francisco). MARS<sup>122</sup> was used for spin system identification, combined with manual verification.

## **SEC-SAXS**

Size exclusion chromatography coupled with small-angle x-ray scattering (SEC-SAXS) experiments were conducted on the BM29 beamline at the European Synchrotron Radiation Facility (Grenoble, France) using a Superdex 200 Increase 5/150 GL column. 30 μL of protein sample (containing 25 μM of ImpB with or without 125 μM of Rev), previously spun (21 000 g, 10 min), were injected and the flow rate maintained at 0.35 ml/min using 50 mM Tris buffer, pH 8, 100 mM NaCl. Acquisitions (1 sec / frame) were recorded during 10 and 1000 s for buffer and protein, respectively. Individual frames were processed using the software BsxCUBE, yielding individual radially averaged curves of normalized intensity versus scattering angle. Time frames corresponding to each elution peak were combined to give the average scattering curve for each measurement. The averaged spectrum of the buffer was subtracted from the averaged spectrum of protein before data analysis. Primary data reduction was performed and model-independent parameters  $R_g$  and  $D_{max}$  were determined using the program PRIMUS<sup>123</sup>. The program CRY SOL<sup>124</sup> was used to calculate the theoretical scattering from individual crystal structures. Normal mode perturbed models of Impβ (PDB 1UKL ) were calculated for the five lowest-frequency vibrational modes using the ElNemo web server<sup>125</sup> with parameter values of DQMIN=-400 and DQMAX=400 for the amplitude range and of DQSTEP=20 for the increment.

## Fluorescence polarization (FP) assays

Fluorescence polarization assays were performed as previously described<sup>111</sup> in black 384-well plates (Greiner ref. 781076, Greiner Bio-One) on a Clariostar plate reader (BMG Labtech) using a  $540 \pm 20$  nm excitation filter, a  $590 \pm 20$  nm emission filter and an LP565 dichroic mirror. The inhibition assays were carried out in a total volume of 10  $\mu$ L, with 195 nM Imp $\beta$ , 200 nM Rev-NLS-TAMRA peptide and 4.3 nM - 35  $\mu$ M Rev variants. Curves obtained with each Imp $\beta$  and Rev protein were independently fitted and the IC<sub>50</sub> values were determined with GraphPad Prism 9 software using the equation  $F = F_{min} + (F_{max} - F_{min}) / (1 + 10^{((\text{Log}IC_{50} - X) * \text{HillSlope}))}$ , where  $F_{min}$  and  $F_{max}$  are the fluorescence polarization values at saturating Rev concentration and in the absence of Rev, respectively, and  $X$  is the common logarithm of the Rev concentration.

## Molecular Docking with HADDOCK

The helical hairpin domain of Rev (PDB 2X7L chain M) was docked onto Imp $\beta$  (PDB 1UKL chain A) using the HADDOCK2.2 webserver<sup>99</sup>. HADDOCK uses biochemical information on interacting residues as ambiguous interaction restraints (AIRs) to drive the docking. Residues directly implicated or potentially involved in mediating the interaction are defined as "active" and "passive", respectively. Each AIR is defined between an active residue of one molecule and specific active or passive residues of the other. Passive residues for Rev were defined as all residues (res. 9-65) except those designated as active, while passive residues for Imp $\beta$  were defined as all solvent-accessible residues on the concave inner surface of the protein. (See footnote 2 of **Table S2** for the explicit list of residues). The set of AIRs and corresponding cutoff distances for each docking experiment are listed in **Tables S2A** and **S4A**. For BS3 crosslinking restraints the cutoff distance between the C $\beta$  atoms of crosslinked lysine residues was set at 30 Å. For AIRs between Rev Arg residues and Imp $\beta$  Asp or Glu residues that yielded compensatory mutagenesis effects the C $\beta$ -C $\beta$  cutoff distance was set to a value between 5 and 8 Å depending on the associated  $\Delta\Delta pIC_{50}$  value (**Figure 9f**), with shorter distances assigned to residue pairs yielding larger  $\Delta\Delta pIC_{50}$  values. The HADDOCK docking protocol consists of randomization of orientations and rigid body energy minimization, semi-rigid simulated annealing in torsion angle space, and final refinement in Cartesian space with explicit solvent. For each docking experiment, a total of 1000 complex configurations were calculated in the randomization stage. The best 200 solutions were then used in the semi-rigid and final refinement stages, in which the side chain and backbone atoms of Imp $\beta$  and Rev were allowed to move. The final structures were ranked according to HADDOCK score and clustered by pairwise backbone RMSD. Clusters were then ranked according to the average of the four best-scoring structures within each cluster. In all docking experiments the top-ranked cluster scored substantially better than the next ranked cluster and was also the largest in size.

## Rigid body docking

Rigid body sampling was performed with the Rev helical hairpin domain (PDB 2X7L chain M) and Imp $\beta$  (PDB 1UKL chain A) using in-house Unix shell and Fortran scripts combined with the program Lsqkab from the CCP4 suite<sup>126</sup>.

Two independent docking jobs were run for Rev bound either to the N-site or the C-site of Imp $\beta$ . For each job, the Imp $\beta$  structure was held fixed while Rev was rotated and translated in a 6-dimensional search. The translational search was performed on a 4 Å grid spacing over grid points located within 35 Å of C $\alpha$  atoms of the Imp $\beta$  lysine residues that formed BS3 crosslinks with Rev Lys20 (Group-1 residues in **Figure 6b**; Lys residues 23, 62 and 68 in the case of the N-site, and Lys residues 854, 857, 859, 867 and 873 in the case of the C-site). In total 879 and 714 grid points were used for the N-site and C-site docking jobs, respectively. Rotations of Rev were performed with the C $\beta$  atom of Rev Lys20 held fixed at the origin of the rotation, which was centered on each grid point. The rotational search employed a 15° polar angle step size (4056 orientations per grid point), resulting in >3.5 and >2.8 million configurations for the N- and C- sites, respectively.

For each docking configuration, the steric overlap between Rev and Imp $\beta$  was estimated using a mask overlap procedure, as follows. A mask for Imp $\beta$  was generated at 5 Å sampling resolution by (i) rounding the coordinates of each atom to the nearest multiple of 5 Å, (ii) sorting the resulting file on the rounded coordinates (i.e., sorting for increasing value of x then y then z) and (iii) removing duplicate coordinates from the sorted file. These same steps were then used to generate a mask for Rev for each docking configuration. For each configuration a combined mask covering both the Imp $\beta$  and Rev structures was generated by concatenating the individual Imp $\beta$  and Rev mask files, sorting the resulting file on the mask coordinates, and removing duplicate coordinates from the sorted file. The overlap between the Imp $\beta$  and Rev masks was then given by  $N_{overlap} = N_{Imp\beta} + N_{Rev} - N_{comb}$ , where  $N_{Imp\beta}$ ,  $N_{Rev}$  and  $N_{comb}$  are the number of mask points in the Imp $\beta$ , Rev and combined masks, respectively.  $N_{overlap}$  values above 15 were found to correspond to a large steric overlap between Imp $\beta$  and Rev that could not be relieved by simply reorienting the side chains of these two proteins. Docking configurations yielding an  $N_{overlap} > 15$  were thus rejected from further analysis. The number of configurations that survived this steric overlap criterion was approximately 1.5 and 1.9 million for the N- and C-site, respectively. For each surviving configuration, C $\beta$ -C $\beta$  distances were calculated for the ten Imp $\beta$ /Rev residue pairs indicated in **Figure S7A** and used to generate the boxplots and distance distribution diagrams shown in **Figures S7A and B**.

For the docking of Rev to the C-site of Imp $\beta$ , configurations were subsequently filtered according to the distance cutoff criteria indicated in **Table S3A**, resulting in the 15 configurations shown in **Figure 10b**. These configurations were then ranked as follows. For each of the 8 Imp $\beta$ /Rev residue pairs mediating compensatory mutation effects (left column of **Table S3A**) the minimal distance ( $D_{min}$ ) between the Imp $\beta$  and Rev residues was calculated over all sterically allowed side chain rotamers. (In a few cases where the two closest Imp $\beta$  and Rev rotamers sterically overlapped the value of  $D_{min}$  was set to 2.3 Å). Each  $D_{min}$  value was then weighted by the corresponding  $\Delta\Delta pIC_{50}$  value (**Figure 9g**) and the weighted mean ( $\langle \Delta\Delta pIC_{50} * D_{min} \rangle$ ) was calculated over all eight residue pairs. Docking configurations were then ranked in increasing value of  $\langle \Delta\Delta pIC_{50} * D_{min} \rangle$ , which ranged from 4.6 Å for the top-ranked solution to 7.31 Å for the solution ranked 15<sup>th</sup>.

## Average Docking Model of Rev bound to the C-site of Imp $\beta$

The average configuration of Rev bound to the Imp $\beta$  C-site was calculated from a total of 43 individual docking configurations. These consist of the 15 configurations obtained by rigid body docking (indicated in **Figure 10b** and **Table S3**) and 28 configurations (the 4 lowest energy structures from each of the 7 clusters) from the final HADDOCK experiment (**Figure 10c** and **Table S4**). The 43 configurations were superimposed onto a reference Imp $\beta$  structure and the centroid of all 43 Rev structures was calculated. The 43 Rev structures were then translated so as to have their individual centroids coincident at this common centroid position. A Rev search model (PDB 2X7L chain M) was then centered on this position in an arbitrary orientation and a rotational search was performed using a 10° polar angle step size (12,996 orientations). For each orientation a distance score was calculated between representative atoms located along the three principal axes of the Rev search model and the corresponding atoms of the 43 individual Rev structures. The orientation yielding the lowest score was selected as the average docking configuration.

## ACKNOWLEDGEMENTS

We acknowledge the European Synchrotron Radiation Facility for provision of synchrotron radiation facilities. We thank M.E. Brennich and M. Tully for assistance in using beamline BM29, L. Shamseddine for help with protein purification, A. Le Roy for SEC/MALLS analysis, J.P. Andrieu for amino acid analysis, H. Dawi for initial HADDOCK experiments, A. Sinz, C. Ihling and M. Schäfer for exploratory XL-MS experiments, and T. Gossenreiter, D. Anrather and M. Hartl from the Mass Spectrometry Facility at Max Perutz Labs for BS3 crosslinking analyses, which were performed using the VBCF instrument pool. This study was supported by grants (to CP) from the ANRS and Fondation de France and PhD funding (to DS) from the ANRS and CEA. This work used the platforms of the Grenoble Instruct-ERIC center (ISBG; UAR 3518 CNRS-CEA-UGA-EMBL) within the Grenoble Partnership for Structural Biology (PSB), supported by FRISBI (ANR-10-INBS-0005-02) and GRAL, financed within the University Grenoble Alpes graduate school (Ecoles Universitaires de Recherche) CBH-EUR-GS (ANR-17-EURE-0003).

## CONFLICT OF INTEREST STATEMENT

The authors declare that they have no conflict of interest.

## REFERENCES

- 1 Sodroski, J., Goh, W. C., Rosen, C., Dayton, A., Terwilliger, E. & Haseltine, W. A second post-transcriptional trans-activator gene required for HTLV-III replication. *Nature* **321**, 412-417 (1986). doi.org/10.1038/321412a0
- 2 Feinberg, M. B., Jarrett, R. F., Aldovini, A., Gallo, R. C. & Wong-Staal, F. HTLV-III expression and production involve complex regulation at the levels of splicing and translation of viral RNA. *Cell* **46**, 807-817 (1986). doi.org/10.1016/0092-8674(86)90062-0
- 3 Pollard, V. W. & Malim, M. H. The HIV-1 Rev protein. *Annu Rev Microbiol* **52**, 491-532 (1998). doi.org/10.1146/annurev.micro.52.1.491
- 4 Karn, J. & Stoltzfus, C. M. Transcriptional and posttranscriptional regulation of HIV-1 gene expression. *Cold Spring Harb Perspect Med* **2**, a006916 (2012). doi.org/10.1101/cshperspect.a006916



- 5 Fernandes, J. D., Booth, D. S. & Frankel, A. D. A structurally plastic ribonucleoprotein complex mediates post-transcriptional gene regulation in HIV-1. *Wiley Interdiscip Rev RNA* **7**, 470-486 (2016). doi.org/10.1002/wrna.1342
- 6 Wegener, M. & Muller-McNicoll, M. Nuclear retention of mRNAs - quality control, gene regulation and human disease. *Semin Cell Dev Biol* **79**, 131-142 (2018). doi.org/10.1016/j.semcdb.2017.11.001
- 7 Williams, T., Ngo, L. H. & Wickramasinghe, V. O. Nuclear export of RNA: Different sizes, shapes and functions. *Semin Cell Dev Biol* **75**, 70-77 (2018). doi.org/10.1016/j.semcdb.2017.08.054
- 8 Malim, M. H., Hauber, J., Le, S. Y., Maizel, J. V. & Cullen, B. R. The HIV-1 rev trans-activator acts through a structured target sequence to activate nuclear export of unspliced viral mRNA. *Nature* **338**, 254-257 (1989). doi.org/10.1038/338254a0
- 9 Emerman, M., Vazeux, R. & Peden, K. The rev gene product of the human immunodeficiency virus affects envelope-specific RNA localization. *Cell* **57**, 1155-1165 (1989). doi.org/10.1016/0092-8674(89)90053-6
- 10 Felber, B. K., Hadzopoulou-Cladaras, M., Cladaras, C., Copeland, T. & Pavlakis, G. N. rev protein of human immunodeficiency virus type 1 affects the stability and transport of the viral mRNA. *Proc Natl Acad Sci U S A* **86**, 1495-1499 (1989). doi.org/10.1073/pnas.86.5.1495
- 11 Hadzopoulou-Cladaras, M., Felber, B. K., Cladaras, C., Athanassopoulos, A., Tse, A. & Pavlakis, G. N. The rev (trs/art) protein of human immunodeficiency virus type 1 affects viral mRNA and protein expression via a cis-acting sequence in the env region. *J Virol* **63**, 1265-1274 (1989).
- 12 Dayton, E. T., Powell, D. M. & Dayton, A. I. Functional analysis of CAR, the target sequence for the Rev protein of HIV-1. *Science* **246**, 1625-1629 (1989). doi.org/10.1126/science.2688093
- 13 Malim, M. H. & Cullen, B. R. HIV-1 structural gene expression requires the binding of multiple Rev monomers to the viral RRE: implications for HIV-1 latency. *Cell* **65**, 241-248 (1991). doi.org/10.1016/0092-8674(91)90158-u
- 14 Mann, D. A., Mikaelian, I., Zimmel, R. W., Green, S. M., Lowe, A. D., Kimura, T., Singh, M., Butler, P. J., Gait, M. J. & Karn, J. A molecular rheostat. Co-operative rev binding to stem I of the rev-response element modulates human immunodeficiency virus type-1 late gene expression. *J Mol Biol* **241**, 193-207 (1994). doi.org/10.1006/jmbi.1994.1488
- 15 Fornerod, M., Ohno, M., Yoshida, M. & Mattaj, I. W. CRM1 is an export receptor for leucine-rich nuclear export signals. *Cell* **90**, 1051-1060 (1997).
- 16 Fukuda, M., Asano, S., Nakamura, T., Adachi, M., Yoshida, M., Yanagida, M. & Nishida, E. CRM1 is responsible for intracellular transport mediated by the nuclear export signal. *Nature* **390**, 308-311 (1997).
- 17 Neville, M., Stutz, F., Lee, L., Davis, L. I. & Rosbash, M. The importin-beta family member Crm1p bridges the interaction between Rev and the nuclear pore complex during nuclear export. *Curr Biol* **7**, 767-775 (1997). doi.org/10.1016/s0960-9822(06)00335-6
- 18 Kjems, J., Frankel, A. D. & Sharp, P. A. Specific regulation of mRNA splicing in vitro by a peptide from HIV-1 Rev. *Cell* **67**, 169-178 (1991). doi.org/10.1016/0092-8674(91)90580-r
- 19 Kjems, J. & Sharp, P. A. The basic domain of Rev from human immunodeficiency virus type 1 specifically blocks the entry of U4/U6.U5 small nuclear ribonucleoprotein in spliceosome assembly. *J Virol* **67**, 4769-4776 (1993).
- 20 Powell, D. M., Amaral, M. C., Wu, J. Y., Maniatis, T. & Greene, W. C. HIV Rev-dependent binding of SF2/ASF to the Rev response element: possible role in Rev-mediated inhibition of HIV RNA splicing. *Proc Natl Acad Sci U S A* **94**, 973-978 (1997).
- 21 Arrigo, S. J. & Chen, I. S. Rev is necessary for translation but not cytoplasmic accumulation of HIV-1 vif, vpr, and env/vpu 2 RNAs. *Genes Dev* **5**, 808-819 (1991). doi.org/10.1101/gad.5.5.808
- 22 D'Agostino, D. M., Felber, B. K., Harrison, J. E. & Pavlakis, G. N. The Rev protein of human immunodeficiency virus type 1 promotes polysomal association and translation of gag/pol and vpu/env mRNAs. *Mol Cell Biol* **12**, 1375-1386 (1992). doi.org/10.1128/mcb.12.3.1375
- 23 Perales, C., Carrasco, L. & Gonzalez, M. E. Regulation of HIV-1 env mRNA translation by Rev protein. *Biochim Biophys Acta* **1743**, 169-175 (2005). doi.org/10.1016/j.bbamcr.2004.09.030
- 24 Brandt, S., Blissenbach, M., Grewe, B., Konietzny, R., Grunwald, T. & Uberla, K. Rev proteins of human and simian immunodeficiency virus enhance RNA encapsidation. *PLoS Pathog* **3**, e54 (2007).
- 25 Blissenbach, M., Grewe, B., Hoffmann, B., Brandt, S. & Uberla, K. Nuclear RNA export and packaging functions of HIV-1 Rev revisited. *J Virol* **84**, 6598-6604 (2010). doi.org/10.1128/JVI.02264-09

- 26 Grewe, B., Ehrhardt, K., Hoffmann, B., Blissenbach, M., Brandt, S. & Uberla, K. The HIV-1 Rev protein enhances encapsidation of unspliced and spliced, RRE-containing lentiviral vector RNA. *PLoS One* **7**, e48688 (2012). doi.org/10.1371/journal.pone.0048688
- 27 Lata, S., Ali, A., Sood, V., Raja, R. & Banerjee, A. C. HIV-1 Rev downregulates Tat expression and viral replication via modulation of NAD(P)H:quinine oxidoreductase 1 (NQO1). *Nat Commun* **6**, 7244 (2015). doi.org/10.1038/ncomms8244
- 28 Rosenbluh, J., Hayouka, Z., Loya, S., Levin, A., Armon-Omer, A., Britan, E., Hizi, A., Kotler, M., Friedler, A. & Loyter, A. Interaction between HIV-1 Rev and integrase proteins: a basis for the development of anti-HIV peptides. *J Biol Chem* **282**, 15743-15753 (2007). doi.org/10.1074/jbc.M609864200
- 29 Levin, A., Hayouka, Z., Friedler, A. & Loyter, A. Nucleocytoplasmic shuttling of HIV-1 integrase is controlled by the viral Rev protein. *Nucleus* **1**, 190-201 (2010). doi.org/10.4161/nucl.1.2.11300
- 30 Jager, S., Cimermancic, P., Gulbahce, N., Johnson, J. R., McGovern, K. E., Clarke, S. C., Shales, M., Mercenne, G., Pache, L., Li, K. *et al.* Global landscape of HIV-human protein complexes. *Nature* **481**, 365-370 (2011). doi.org/10.1038/nature10719
- 31 Hadian, K., Vincendeau, M., Mausbacher, N., Nagel, D., Hauck, S. M., Ueffing, M., Loyter, A., Werner, T., Wolff, H. & Brack-Werner, R. Identification of a heterogeneous nuclear ribonucleoprotein-recognition region in the HIV Rev protein. *J Biol Chem* **284**, 33384-33391 (2009). doi.org/10.1074/jbc.M109.021659
- 32 Robertson-Anderson, R. M., Wang, J., Edgcomb, S. P., Carmel, A. B., Williamson, J. R. & Millar, D. P. Single-molecule studies reveal that DEAD box protein DDX1 promotes oligomerization of HIV-1 Rev on the Rev response element. *J Mol Biol* **410**, 959-971 (2011). doi.org/10.1016/j.jmb.2011.04.026
- 33 Naji, S., Ambrus, G., Cimermancic, P., Reyes, J. R., Johnson, J. R., Filbrandt, R., Huber, M. D., Vesely, P., Krogan, N. J., Yates, J. R., 3rd *et al.* Host cell interactome of HIV-1 Rev includes RNA helicases involved in multiple facets of virus production. *Mol Cell Proteomics* **11**, M111 015313 (2012). doi.org/10.1074/mcp.M111.015313
- 34 Lamichhane, R., Hammond, J. A., Pauszek, R. F., 3rd, Anderson, R. M., Pedron, I., van der Schans, E., Williamson, J. R. & Millar, D. P. A DEAD-box protein acts through RNA to promote HIV-1 Rev-RRE assembly. *Nucleic Acids Res* **45**, 4632-4641 (2017). doi.org/10.1093/nar/gkx206
- 35 Hammond, J. A., Zhou, L., Lamichhane, R., Chu, H. Y., Millar, D. P., Gerace, L. & Williamson, J. R. A Survey of DDX21 Activity During Rev/RRE Complex Formation. *J Mol Biol* **430**, 537-553 (2018). doi.org/10.1016/j.jmb.2017.06.023
- 36 Pemberton, L. F. & Paschal, B. M. Mechanisms of receptor-mediated nuclear import and nuclear export. *Traffic* **6**, 187-198 (2005).
- 37 Stewart, M. Molecular mechanism of the nuclear protein import cycle. *Nat Rev Mol Cell Biol* **8**, 195-208 (2007).
- 38 Lott, K. & Cingolani, G. The importin beta binding domain as a master regulator of nucleocytoplasmic transport. *Biochim Biophys Acta* **1813**, 1578-1592 (2011). doi.org/10.1016/j.bbamcr.2010.10.012
- 39 Chook, Y. M. & Suel, K. E. Nuclear import by karyopherin-betas: recognition and inhibition. *Biochim Biophys Acta* **1813**, 1593-1606 (2011).
- 40 Kimura, M. & Imamoto, N. Biological significance of the importin-beta family-dependent nucleocytoplasmic transport pathways. *Traffic* **15**, 727-748 (2014). doi.org/10.1111/tra.12174
- 41 Christie, M., Chang, C. W., Rona, G., Smith, K. M., Stewart, A. G., Takeda, A. A., Fontes, M. R., Stewart, M., Vertessy, B. G., Forwood, J. K. *et al.* Structural Biology and Regulation of Protein Import into the Nucleus. *J Mol Biol* **428**, 2060-2090 (2016). doi.org/10.1016/j.jmb.2015.10.023
- 42 Truant, R. & Cullen, B. R. The arginine-rich domains present in human immunodeficiency virus type 1 Tat and Rev function as direct importin beta-dependent nuclear localization signals. *Mol Cell Biol* **19**, 1210-1217 (1999).
- 43 Henderson, B. R. & Percipalle, P. Interactions between HIV Rev and nuclear import and export factors: the Rev nuclear localisation signal mediates specific binding to human importin-beta. *J Mol Biol* **274**, 693-707 (1997).
- 44 Arnold, M., Nath, A., Hauber, J. & Kehlenbach, R. H. Multiple importins function as nuclear transport receptors for the Rev protein of human immunodeficiency virus type 1. *J Biol Chem* **281**, 20883-20890 (2006).

- 45 Gu, L., Tsuji, T., Jarboui, M. A., Yeo, G. P., Sheehy, N., Hall, W. W. & Gautier, V. W. Intermolecular masking of the HIV-1 Rev NLS by the cellular protein HIC: novel insights into the regulation of Rev nuclear import. *Retrovirology* **8**, 17 (2011).
- 46 Conti, E., Uy, M., Leighton, L., Blobel, G. & Kuriyan, J. Crystallographic analysis of the recognition of a nuclear localization signal by the nuclear import factor karyopherin alpha. *Cell* **94**, 193-204 (1998).
- 47 Conti, E. & Kuriyan, J. Crystallographic analysis of the specific yet versatile recognition of distinct nuclear localization signals by karyopherin alpha. *Structure* **8**, 329-338 (2000).
- 48 Cingolani, G., Petosa, C., Weis, K. & Muller, C. W. Structure of importin-beta bound to the IBB domain of importin-alpha. *Nature* **399**, 221-229 (1999).
- 49 Forwood, J. K., Lange, A., Zachariae, U., Marfori, M., Prest, C., Grubmuller, H., Stewart, M., Corbett, A. H. & Kobe, B. Quantitative structural analysis of importin-beta flexibility: paradigm for solenoid protein structures. *Structure* **18**, 1171-1183 (2010).
- 50 Tauchert, M. J., Hemonnot, C., Neumann, P., Koster, S., Ficner, R. & Dickmanns, A. Impact of the crystallization condition on importin-beta conformation. *Acta Crystallogr D Struct Biol* **72**, 705-717 (2016). doi.org/10.1107/S2059798316004940
- 51 Vetter, I. R., Arndt, A., Kutay, U., Gorlich, D. & Wittinghofer, A. Structural view of the Ran-Importin beta interaction at 2.3 Å resolution. *Cell* **97**, 635-646 (1999).
- 52 Lee, S. J., Matsuura, Y., Liu, S. M. & Stewart, M. Structural basis for nuclear import complex dissociation by RanGTP. *Nature* **435**, 693-696 (2005).
- 53 Forwood, J. K., Lonhienne, T. G., Marfori, M., Robin, G., Meng, W., Guncar, G., Liu, S. M., Stewart, M., Carroll, B. J. & Kobe, B. Kap95p binding induces the switch loops of RanGDP to adopt the GTP-bound conformation: implications for nuclear import complex assembly dynamics. *J Mol Biol* **383**, 772-782 (2008). doi.org/10.1016/j.jmb.2008.07.090
- 54 Bayliss, R., Littlewood, T. & Stewart, M. Structural basis for the interaction between FxFG nucleoporin repeats and importin-beta in nuclear trafficking. *Cell* **102**, 99-108 (2000).
- 55 Bayliss, R., Littlewood, T., Strawn, L. A., Went, S. R. & Stewart, M. GLFG and FxFG nucleoporins bind to overlapping sites on importin-beta. *J Biol Chem* **277**, 50597-50606 (2002).
- 56 Liu, S. M. & Stewart, M. Structural basis for the high-affinity binding of nucleoporin Nup1p to the *Saccharomyces cerevisiae* importin-beta homologue, Kap95p. *J Mol Biol* **349**, 515-525 (2005). doi.org/10.1016/j.jmb.2005.04.003
- 57 Ivic, N., Potocnjak, M., Solis-Mezarino, V., Herzog, F., Bilokapic, S. & Halic, M. Fuzzy Interactions Form and Shape the Histone Transport Complex. *Mol Cell* **73**, 1191-1203 e1196 (2019). doi.org/10.1016/j.molcel.2019.01.032
- 58 Cingolani, G., Bednenko, J., Gillespie, M. T. & Gerace, L. Molecular basis for the recognition of a nonclassical nuclear localization signal by importin beta. *Mol Cell* **10**, 1345-1353 (2002).
- 59 Lee, S. J., Sekimoto, T., Yamashita, E., Nagoshi, E., Nakagawa, A., Imamoto, N., Yoshimura, M., Sakai, H., Chong, K. T., Tsukihara, T. *et al.* The structure of importin-beta bound to SREBP-2: nuclear import of a transcription factor. *Science* **302**, 1571-1575 (2003).
- 60 Wohlwend, D., Strasser, A., Dickmanns, A. & Ficner, R. Structural basis for RanGTP independent entry of spliceosomal U snRNPs into the nucleus. *J Mol Biol* **374**, 1129-1138 (2007). doi.org/10.1016/j.jmb.2007.09.065
- 61 Mitrousis, G., Olia, A. S., Walker-Kopp, N. & Cingolani, G. Molecular basis for the recognition of snurportin 1 by importin beta. *J Biol Chem* **283**, 7877-7884 (2008). doi.org/10.1074/jbc.M709093200
- 62 Bhardwaj, A. & Cingolani, G. Conformational selection in the recognition of the snurportin importin beta binding domain by importin beta. *Biochemistry* **49**, 5042-5047 (2010). doi.org/10.1021/bi100292y
- 63 Choi, S., Yamashita, E., Yasuhara, N., Song, J., Son, S. Y., Won, Y. H., Hong, H. R., Shin, Y. S., Sekimoto, T., Park, I. Y. *et al.* Structural basis for the selective nuclear import of the C2H2 zinc-finger protein Snail by importin beta. *Acta Crystallogr D Biol Crystallogr* **70**, 1050-1060 (2014). doi.org/10.1107/S1399004714000972
- 64 Scanlon, M. J., Fairlie, D. P., Craik, D. J., Englebretsen, D. R. & West, M. L. NMR solution structure of the RNA-binding peptide from human immunodeficiency virus (type 1) Rev. *Biochemistry* **34**, 8242-8249 (1995). doi.org/10.1021/bi00026a005
- 65 Daugherty, M. D., Liu, B. & Frankel, A. D. Structural basis for cooperative RNA binding and export complex assembly by HIV Rev. *Nat Struct Mol Biol* **17**, 1337-1342 (2010).

- 66 Casu, F., Duggan, B. M. & Hennig, M. The arginine-rich RNA-binding motif of HIV-1 Rev is intrinsically disordered and folds upon RRE binding. *Biophys J* **105**, 1004-1017 (2013). doi.org/10.1016/j.bpj.2013.07.022
- 67 DiMattia, M. A., Watts, N. R., Cheng, N., Huang, R., Heymann, J. B., Grimes, J. M., Wingfield, P. T., Stuart, D. I. & Steven, A. C. The Structure of HIV-1 Rev Filaments Suggests a Bilateral Model for Rev-RRE Assembly. *Structure* **24**, 1068-1080 (2016). doi.org/10.1016/j.str.2016.04.015
- 68 Watts, N. R., Eren, E., Zhuang, X., Wang, Y. X., Steven, A. C. & Wingfield, P. T. A new HIV-1 Rev structure optimizes interaction with target RNA (RRE) for nuclear export. *J Struct Biol* **203**, 102-108 (2018). doi.org/10.1016/j.jsb.2018.03.011
- 69 DiMattia, M. A., Watts, N. R., Stahl, S. J., Rader, C., Wingfield, P. T., Stuart, D. I., Steven, A. C. & Grimes, J. M. Implications of the HIV-1 Rev dimer structure at 3.2 Å resolution for multimeric binding to the Rev response element. *Proc Natl Acad Sci U S A* **107**, 5810-5814 (2010).
- 70 Battiste, J. L., Mao, H., Rao, N. S., Tan, R., Muhandiram, D. R., Kay, L. E., Frankel, A. D. & Williamson, J. R. Alpha helix-RNA major groove recognition in an HIV-1 rev peptide-RRE RNA complex. *Science* **273**, 1547-1551 (1996). doi.org/10.1126/science.273.5281.1547
- 71 Ye, X., Gorin, A., Ellington, A. D. & Patel, D. J. Deep penetration of an alpha-helix into a widened RNA major groove in the HIV-1 rev peptide-RNA aptamer complex. *Nat Struct Biol* **3**, 1026-1033 (1996).
- 72 Ye, X., Gorin, A., Frederick, R., Hu, W., Majumdar, A., Xu, W., McLendon, G., Ellington, A. & Patel, D. J. RNA architecture dictates the conformations of a bound peptide. *Chem Biol* **6**, 657-669 (1999).
- 73 Daugherty, M. D., Booth, D. S., Jayaraman, B., Cheng, Y. & Frankel, A. D. HIV Rev response element (RRE) directs assembly of the Rev homooligomer into discrete asymmetric complexes. *Proc Natl Acad Sci U S A* **107**, 12481-12486 (2010). doi.org/10.1073/pnas.1007022107
- 74 Jayaraman, B., Crosby, D. C., Homer, C., Ribeiro, I., Mavor, D. & Frankel, A. D. RNA-directed remodeling of the HIV-1 protein Rev orchestrates assembly of the Rev-Rev response element complex. *Elife* **3**, e04120 (2014). doi.org/10.7554/eLife.04120
- 75 Dearborn, A. D., Eren, E., Watts, N. R., Palmer, I. W., Kaufman, J. D., Steven, A. C. & Wingfield, P. T. Structure of an RNA Aptamer that Can Inhibit HIV-1 by Blocking Rev-Cognate RNA (RRE) Binding and Rev-Rev Association. *Structure* **26**, 1187-1195 e1184 (2018). doi.org/10.1016/j.str.2018.06.001
- 76 Guttler, T., Madl, T., Neumann, P., Deichsel, D., Corsini, L., Monecke, T., Ficner, R., Sattler, M. & Gorlich, D. NES consensus redefined by structures of PKI-type and Rev-type nuclear export signals bound to CRM1. *Nat Struct Mol Biol* **17**, 1367-1376 (2010).
- 77 Faust, O., Grunhaus, D., Shimshon, O., Yavin, E. & Friedler, A. Protein Regulation by Intrinsically Disordered Regions: A Role for Subdomains in the IDR of the HIV-1 Rev Protein. *Chembiochem* **19**, 1618-1624 (2018). doi.org/10.1002/cbic.201800192
- 78 Jayaraman, B., Fernandes, J. D., Yang, S., Smith, C. & Frankel, A. D. Highly Mutable Linker Regions Regulate HIV-1 Rev Function and Stability. *Sci Rep* **9**, 5139 (2019). doi.org/10.1038/s41598-019-41582-7
- 79 Toth-Petroczy, A., Palmedo, P., Ingraham, J., Hopf, T. A., Berger, B., Sander, C. & Marks, D. S. Structured States of Disordered Proteins from Genomic Sequences. *Cell* **167**, 158-170 e112 (2016). doi.org/10.1016/j.cell.2016.09.010
- 80 Behrens, R. T., Aligeti, M., Pocock, G. M., Higgins, C. A. & Sherer, N. M. Nuclear Export Signal Masking Regulates HIV-1 Rev Trafficking and Viral RNA Nuclear Export. *J Virol* **91** (2017). doi.org/10.1128/JVI.02107-16
- 81 Olsen, H. S., Cochrane, A. W., Dillon, P. J., Nalin, C. M. & Rosen, C. A. Interaction of the human immunodeficiency virus type 1 Rev protein with a structured region in env mRNA is dependent on multimer formation mediated through a basic stretch of amino acids. *Genes Dev* **4**, 1357-1364 (1990). doi.org/10.1101/gad.4.8.1357
- 82 Hope, T. J., McDonald, D., Huang, X. J., Low, J. & Parslow, T. G. Mutational analysis of the human immunodeficiency virus type 1 Rev transactivator: essential residues near the amino terminus. *J Virol* **64**, 5360-5366 (1990).
- 83 Bohnlein, E., Berger, J. & Hauber, J. Functional mapping of the human immunodeficiency virus type 1 Rev RNA binding domain: new insights into the domain structure of Rev and Rex. *J Virol* **65**, 7051-7055 (1991).
- 84 Zapp, M. L., Hope, T. J., Parslow, T. G. & Green, M. R. Oligomerization and RNA binding domains of the type 1 human immunodeficiency virus Rev protein: a dual function for an arginine-rich binding motif. *Proc Natl Acad Sci U S A* **88**, 7734-7738 (1991). doi.org/10.1073/pnas.88.17.7734

- 85 Jain, C. & Belasco, J. G. Structural model for the cooperative assembly of HIV-1 Rev multimers on the RRE as deduced from analysis of assembly-defective mutants. *Mol Cell* **7**, 603-614 (2001).
- 86 Thomas, S. L., Oft, M., Jaksche, H., Casari, G., Heger, P., Dobrovnik, M., Bevec, D. & Hauber, J. Functional analysis of the human immunodeficiency virus type 1 Rev protein oligomerization interface. *J Virol* **72**, 2935-2944 (1998).
- 87 Madore, S. J., Tiley, L. S., Malim, M. H. & Cullen, B. R. Sequence requirements for Rev multimerization in vivo. *Virology* **202**, 186-194 (1994). doi.org/10.1006/viro.1994.1334
- 88 Daugherty, M. D., D'Orso, I. & Frankel, A. D. A solution to limited genomic capacity: using adaptable binding surfaces to assemble the functional HIV Rev oligomer on RNA. *Mol Cell* **31**, 824-834 (2008). doi.org/10.1016/j.molcel.2008.07.016
- 89 Edgcomb, S. P., Aschrafi, A., Kompfner, E., Williamson, J. R., Gerace, L. & Hennig, M. Protein structure and oligomerization are important for the formation of export-competent HIV-1 Rev-RRE complexes. *Protein Sci* **17**, 420-430 (2008). doi.org/10.1110/ps.073246608
- 90 Pond, S. J., Ridgeway, W. K., Robertson, R., Wang, J. & Millar, D. P. HIV-1 Rev protein assembles on viral RNA one molecule at a time. *Proc Natl Acad Sci U S A* **106**, 1404-1408 (2009). doi.org/10.1073/pnas.0807388106
- 91 Boeri Erba, E. & Petosa, C. The emerging role of native mass spectrometry in characterizing the structure and dynamics of macromolecular complexes. *Protein Sci* **24**, 1176-1192 (2015). doi.org/10.1002/pro.2661
- 92 Halder, K., Dolker, N., Van, Q., Gregor, I., Dickmanns, A., Baade, I., Kehlenbach, R. H., Ficner, R., Enderlein, J., Grubmuller, H. *et al.* MD simulations and FRET reveal an environment-sensitive conformational plasticity of importin-beta. *Biophys J* **109**, 277-286 (2015). doi.org/10.1016/j.bpj.2015.06.014
- 93 Kragelj, J., Ozenne, V., Blackledge, M. & Jensen, M. R. Conformational propensities of intrinsically disordered proteins from NMR chemical shifts. *Chemphyschem* **14**, 3034-3045 (2013). doi.org/10.1002/cphc.201300387
- 94 Fukuhara, N., Fernandez, E., Ebert, J., Conti, E. & Svergun, D. Conformational variability of nucleocytoplasmic transport factors. *J Biol Chem* **279**, 2176-2181 (2004).
- 95 Fischer, L., Chen, Z. A. & Rappsilber, J. Quantitative cross-linking/mass spectrometry using isotope-labelled cross-linkers. *J Proteomics* **88**, 120-128 (2013). doi.org/10.1016/j.jprot.2013.03.005
- 96 Merkley, E. D., Rysavy, S., Kahraman, A., Hafen, R. P., Daggett, V. & Adkins, J. N. Distance restraints from crosslinking mass spectrometry: mining a molecular dynamics simulation database to evaluate lysine-lysine distances. *Protein Sci* **23**, 747-759 (2014). doi.org/10.1002/pro.2458
- 97 Orban-Nemeth, Z., Beveridge, R., Hollenstein, D. M., Rampler, E., Stranzl, T., Hudecz, O., Doblmann, J., Schlogelhofer, P. & Mechtler, K. Structural prediction of protein models using distance restraints derived from cross-linking mass spectrometry data. *Nat Protoc* **13**, 478-494 (2018). doi.org/10.1038/nprot.2017.146
- 98 Bullock, J., Schwab, J., Thalassinos, K. & Topf, M. The Importance of Non-accessible Crosslinks and Solvent Accessible Surface Distance in Modeling Proteins with Restraints From Crosslinking Mass Spectrometry. *Mol Cell Proteomics* **15**, 2491-2500 (2016). doi.org/10.1074/mcp.M116.058560
- 99 van Zundert, G. C. P., Rodrigues, J., Trellet, M., Schmitz, C., Kastiris, P. L., Karaca, E., Melquiond, A. S. J., van Dijk, M., de Vries, S. J. & Bonvin, A. The HADDOCK2.2 Web Server: User-Friendly Integrative Modeling of Biomolecular Complexes. *J Mol Biol* **428**, 720-725 (2016). doi.org/10.1016/j.jmb.2015.09.014
- 100 Moore, J. D., Yang, J., Truant, R. & Kornbluth, S. Nuclear import of Cdk/cyclin complexes: identification of distinct mechanisms for import of Cdk2/cyclin E and Cdc2/cyclin B1. *J Cell Biol* **144**, 213-224 (1999). doi.org/10.1083/jcb.144.2.213
- 101 Jakel, S. & Gorlich, D. Importin beta, transportin, RanBP5 and RanBP7 mediate nuclear import of ribosomal proteins in mammalian cells. *Embo J* **17**, 4491-4502 (1998). doi.org/10.1093/emboj/17.15.4491
- 102 Kubota, S., Duan, L., Furuta, R. A., Hatanaka, M. & Pomerantz, R. J. Nuclear preservation and cytoplasmic degradation of human immunodeficiency virus type 1 Rev protein. *J Virol* **70**, 1282-1287 (1996). doi.org/10.1128/JVI.70.2.1282-1287.1996
- 103 Fineberg, K., Fineberg, T., Graessmann, A., Luedtke, N. W., Tor, Y., Lixin, R., Jans, D. A. & Loyter, A. Inhibition of nuclear import mediated by the Rev-arginine rich motif by RNA molecules. *Biochemistry* **42**, 2625-2633 (2003). doi.org/10.1021/bi0206199

- 104 Gorlich, D., Henklein, P., Laskey, R. A. & Hartmann, E. A 41 amino acid motif in importin-alpha confers binding to importin-beta and hence transit into the nucleus. *Embo J* **15**, 1810-1817 (1996).
- 105 Weis, K., Ryder, U. & Lamond, A. I. The conserved amino-terminal domain of hSRP1 alpha is essential for nuclear protein import. *Embo J* **15**, 1818-1825 (1996).
- 106 Vercruyse, T. & Daelemans, D. HIV-1 Rev multimerization: mechanism and insights. *Curr HIV Res* **11**, 623-634 (2013). doi.org/10.2174/1570162x12666140307094603
- 107 Heaphy, S., Finch, J. T., Gait, M. J., Karn, J. & Singh, M. Human immunodeficiency virus type 1 regulator of virion expression, rev, forms nucleoprotein filaments after binding to a purine-rich "bubble" located within the rev-responsive region of viral mRNAs. *Proc Natl Acad Sci U S A* **88**, 7366-7370 (1991). doi.org/10.1073/pnas.88.16.7366
- 108 Watts, N. R., Misra, M., Wingfield, P. T., Stahl, S. J., Cheng, N., Trus, B. L., Steven, A. C. & Williams, R. W. Three-dimensional structure of HIV-1 Rev protein filaments. *J Struct Biol* **121**, 41-52 (1998). doi.org/10.1006/jsbi.1998.3964
- 109 Wingfield, P. T., Stahl, S. J., Payton, M. A., Venkatesan, S., Misra, M. & Steven, A. C. HIV-1 Rev expressed in recombinant Escherichia coli: purification, polymerization, and conformational properties. *Biochemistry* **30**, 7527-7534 (1991). doi.org/10.1021/bi00244a023
- 110 Bai, Y., Tambe, A., Zhou, K. & Doudna, J. A. RNA-guided assembly of Rev-RRE nuclear export complexes. *Elife* **3**, e03656 (2014). doi.org/10.7554/eLife.03656
- 111 Ben Fadhel, N., Signor, L., Petosa, C. & Noirclerc-Savoye, M. Phosphomimetic mutations modulate the ability of HIV-1 Rev to bind human Importin  $\beta$  in vitro. *Matters* (2019). doi.org/10.19185/matters.201903000032
- 112 Studier, F. W. Protein production by auto-induction in high density shaking cultures. *Protein Expr Purif* **41**, 207-234 (2005).
- 113 Brautigam, C. A., Zhao, H., Vargas, C., Keller, S. & Schuck, P. Integration and global analysis of isothermal titration calorimetry data for studying macromolecular interactions. *Nat Protoc* **11**, 882-894 (2016). doi.org/10.1038/nprot.2016.044
- 114 Sobott, F., Hernandez, H., McCammon, M. G., Tito, M. A. & Robinson, C. V. A tandem mass spectrometer for improved transmission and analysis of large macromolecular assemblies. *Anal Chem* **74**, 1402-1407 (2002). doi.org/10.1021/ac0110552
- 115 van den Heuvel, R. H., van Duijn, E., Mazon, H., Synowsky, S. A., Lorenzen, K., Versluis, C., Brouns, S. J., Langridge, D., van der Oost, J., Hoyes, J. *et al.* Improving the performance of a quadrupole time-of-flight instrument for macromolecular mass spectrometry. *Anal Chem* **78**, 7473-7483 (2006). doi.org/10.1021/ac061039a
- 116 Boeri Erba, E., Signor, L., Oliva, M. F., Hans, F. & Petosa, C. Characterizing Intact Macromolecular Complexes Using Native Mass Spectrometry. *Methods Mol Biol* **1764**, 133-151 (2018). doi.org/10.1007/978-1-4939-7759-8\_9
- 117 Morgner, N. & Robinson, C. V. Massign: an assignment strategy for maximizing information from the mass spectra of heterogeneous protein assemblies. *Anal Chem* **84**, 2939-2948 (2012). doi.org/10.1021/ac300056a
- 118 Chen, Z. L., Meng, J. M., Cao, Y., Yin, J. L., Fang, R. Q., Fan, S. B., Liu, C., Zeng, W. F., Ding, Y. H., Tan, D. *et al.* A high-speed search engine pLink 2 with systematic evaluation for proteome-scale identification of cross-linked peptides. *Nat Commun* **10**, 3404 (2019). doi.org/10.1038/s41467-019-11337-z
- 119 Tyanova, S., Temu, T. & Cox, J. The MaxQuant computational platform for mass spectrometry-based shotgun proteomics. *Nat Protoc* **11**, 2301-2319 (2016). doi.org/10.1038/nprot.2016.136
- 120 Solyom, Z., Schwarten, M., Geist, L., Konrat, R., Willbold, D. & Brutscher, B. BEST-TROSY experiments for time-efficient sequential resonance assignment of large disordered proteins. *J Biomol NMR* **55**, 311-321 (2013). doi.org/10.1007/s10858-013-9715-0
- 121 Delaglio, F., Grzesiek, S., Vuister, G. W., Zhu, G., Pfeifer, J. & Bax, A. NMRPipe: a multidimensional spectral processing system based on UNIX pipes. *J Biomol NMR* **6**, 277-293 (1995). doi.org/10.1007/BF00197809
- 122 Jung, Y. S. & Zweckstetter, M. Mars -- robust automatic backbone assignment of proteins. *J Biomol NMR* **30**, 11-23 (2004). doi.org/10.1023/B:JNMR.0000042954.99056.ad
- 123 Konarev, P. V., Volkov, V. V., Sokolova, A. V., Koch, M. H. J. & Svergun, D. I. PRIMUS - a Windows-PC based system for small-angle scattering data analysis. *J Appl Crystallogr* **36**, 1277-1282 (2003).

- 124 Svergun, D., Barberato, C. & Koch, M. H. CRY SOL - a program to evaluate X-ray solution scattering of biological macromolecules from atomic coordinates. *J Appl Crystallogr* **28**, 768-773 (1995).
- 125 Suhre, K. & Sanejouand, Y. H. ElNemo: a normal mode web server for protein movement analysis and the generation of templates for molecular replacement. *Nucleic Acids Res* **32**, W610-614 (2004). doi.org/10.1093/nar/gkh368
- 126 Winn, M. D., Ballard, C. C., Cowtan, K. D., Dodson, E. J., Emsley, P., Evans, P. R., Keegan, R. M., Krissinel, E. B., Leslie, A. G., McCoy, A. *et al.* Overview of the CCP4 suite and current developments. *Acta Crystallogr D Biol Crystallogr* **67**, 235-242 (2011). doi.org/10.1107/S0907444910045749
- 127 Marsh, J. A., Singh, V. K., Jia, Z. & Forman-Kay, J. D. Sensitivity of secondary structure propensities to sequence differences between alpha- and gamma-synuclein: implications for fibrillation. *Protein Sci* **15**, 2795-2804 (2006). doi.org/10.1110/ps.062465306

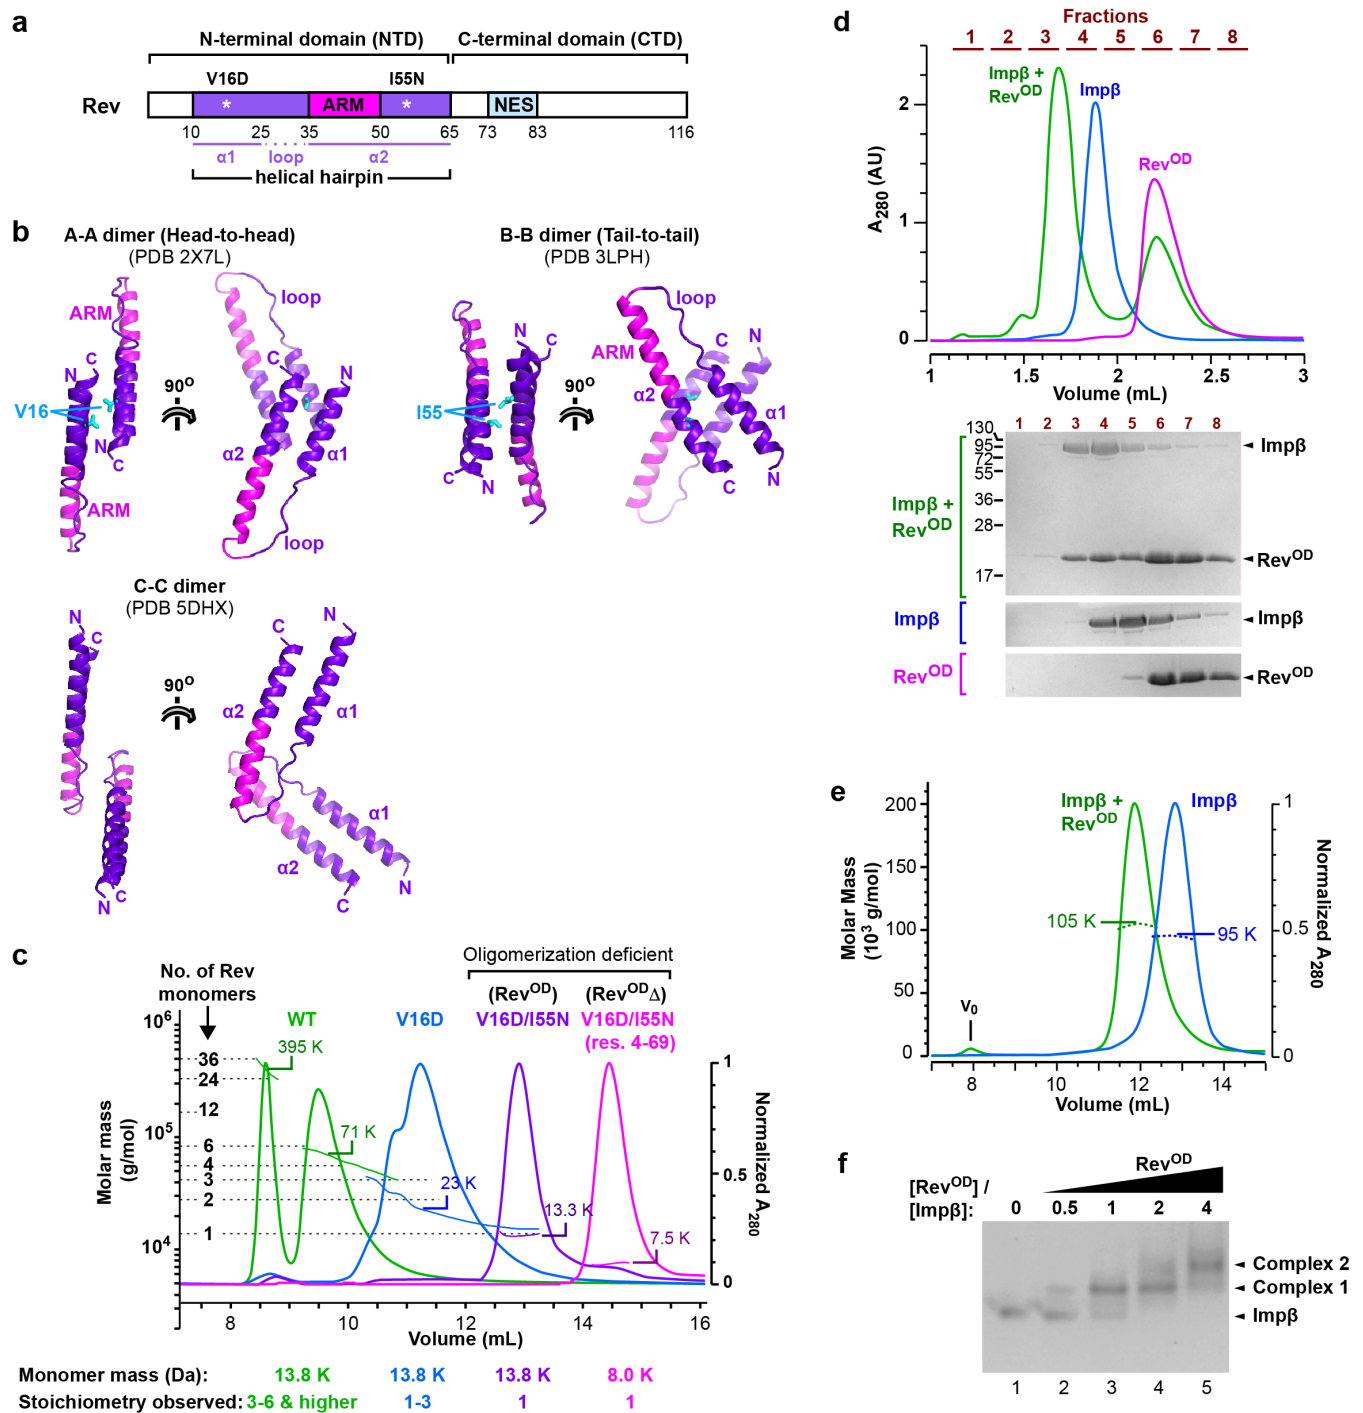

**Figure 1. HIV-1 Rev forms a stable complex with Imp $\beta$ .** **a.** Domain organization of Rev. **b.** Oligomerization interfaces reported for Rev. Residues mutated to destabilize the A-A and B-B interfaces are indicated in cyan. **c.** Analysis of different Rev constructs by SEC/MALLS using a Superdex 75 10/300 GL column. Elution curves recorded at 280 nm and molar mass distributions determined by MALLS are shown for the following Rev constructs: WT (green), V16D (blue), V16D/I55N (purple) and Rev<sup>4-69</sup>(V16D/I55N)(pink). The molar masses detected at the elution peaks are indicated. **d.** SEC analysis of an Imp $\beta$ /Rev<sup>OD</sup> complex. *Top*, elution profiles of samples containing Imp $\beta$  (blue), Rev<sup>OD</sup> (magenta) or a mixture of Imp $\beta$  and Rev<sup>OD</sup> (green). Fractions collected are indicated in brown. Chromatography was performed using a Superdex 200 5/150 column. *Bottom*, SDS-PAGE analysis of the indicated fractions. **e.** SEC/MALLS analysis of Imp $\beta$  in the presence and absence of Rev. Elution curves recorded at 280 nm and molar mass distributions determined by MALLS are shown for Imp $\beta$  in the absence (blue) and presence (green) of Rev<sup>OD</sup>. Chromatography was performed using a Superdex 200 10/30 GL column. Injected concentrations were 40  $\mu$ M Imp $\beta$  and 80  $\mu$ M Rev<sup>OD</sup>. **f.** Native gel analysis showing the association of Imp $\beta$  with one or more monomers of Rev<sup>OD</sup>.



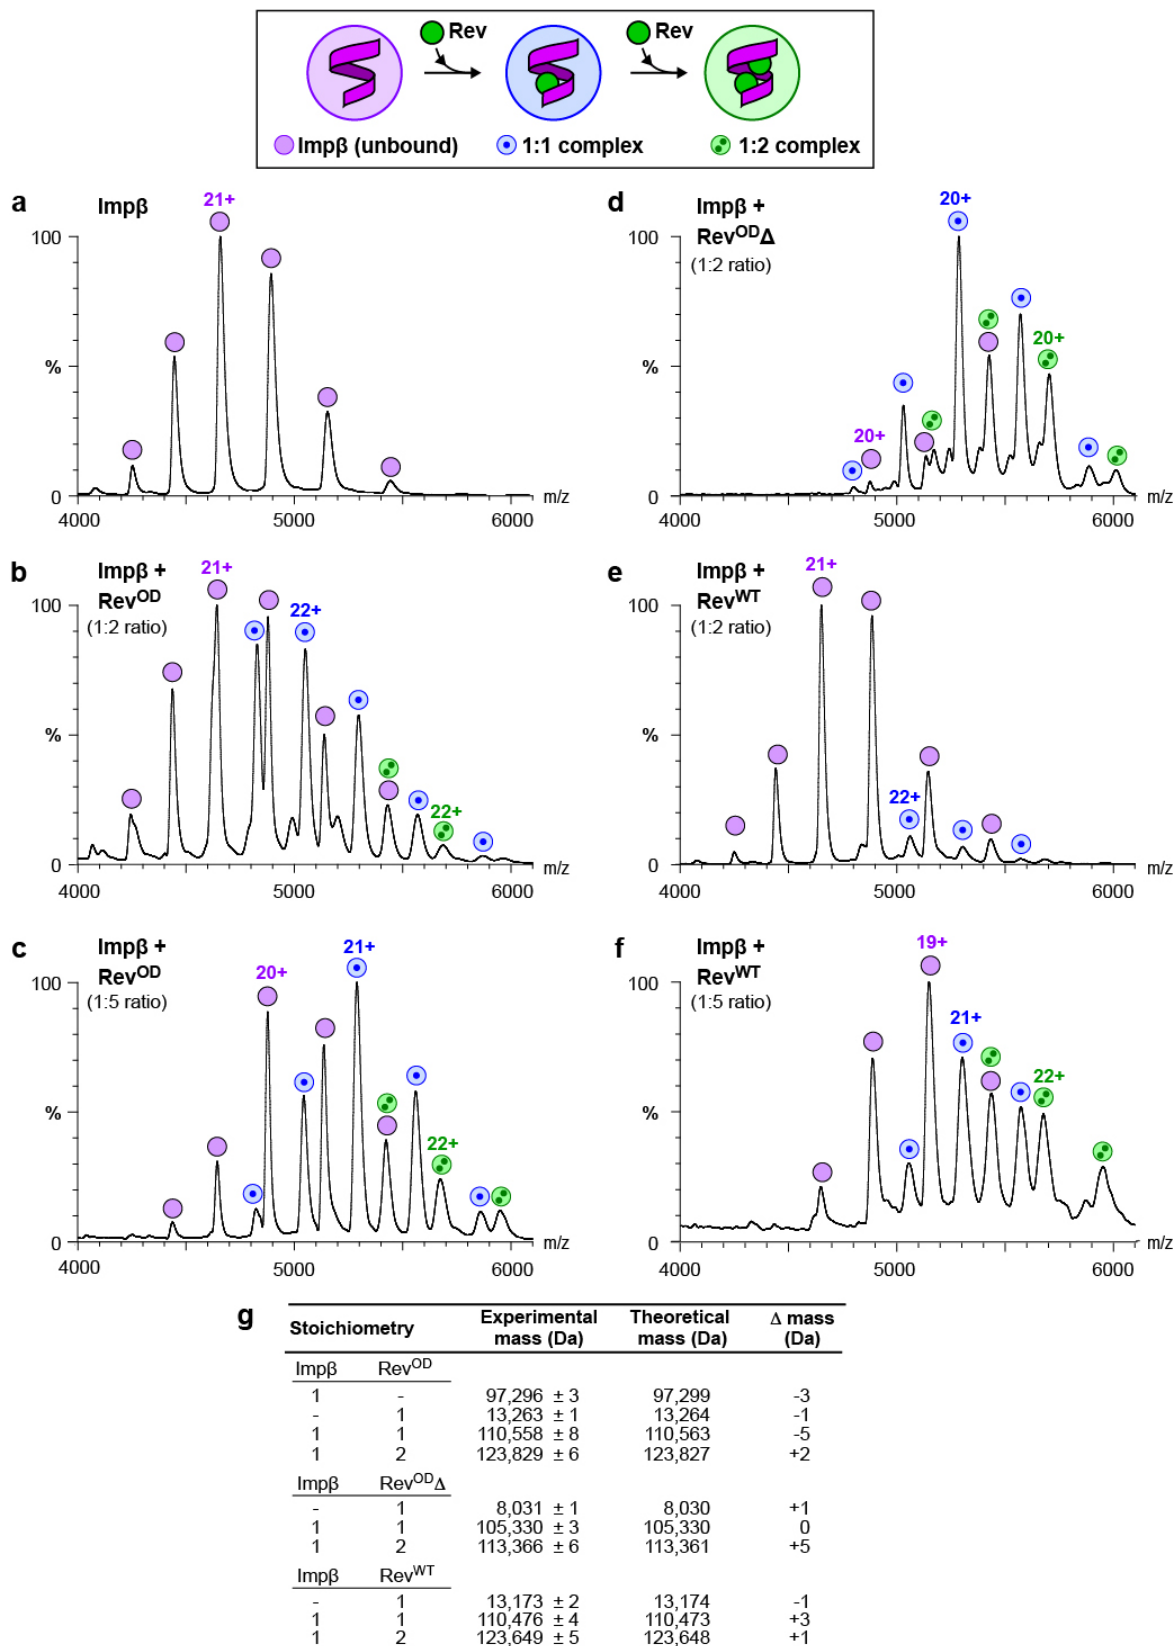

**Figure 2. Native MS reveals that Imp $\beta$  binds up to two Rev monomers.** Peaks labelled by magenta circles correspond to unbound Imp $\beta$ . Peaks labelled by blue circles with a single dot or by green circles with two dots correspond to Imp $\beta$ /Rev complexes with 1:1 or 1:2 stoichiometry, respectively. **a.** Spectrum of Imp $\beta$  in the absence of Rev. **b,c.** Spectra of Imp $\beta$  incubated with a b) 2-fold or c) 5-fold molar equivalent of Rev<sup>OD</sup>. **d.** Spectra of Imp $\beta$  in the presence of the truncated construct Rev<sup>OD</sup> $\Delta$ . **e,f.** Spectra of Imp $\beta$  incubated with a e) 2-fold or f) 5-fold molar equivalent of Rev<sup>WT</sup>. **g.** Summary of masses observed by native MS.

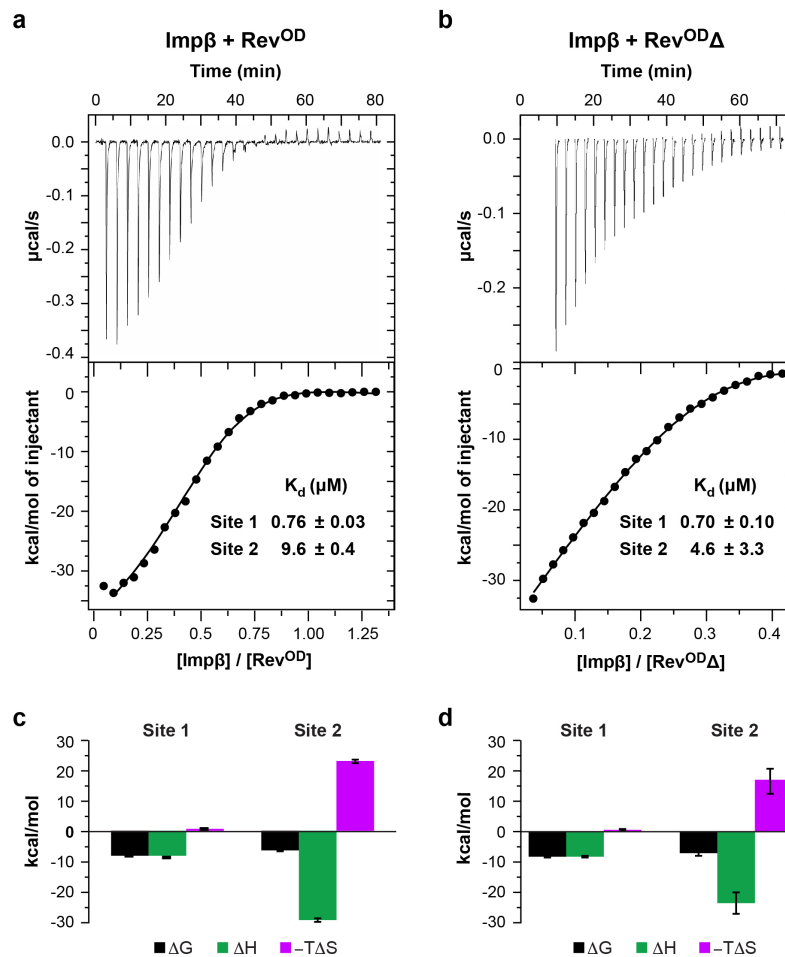

**Figure 3. Rev binds Imp $\beta$  at two sites with sub- and low micromolar affinity. a,b.** ITC profiles of the binding of Imp $\beta$  to a) Rev<sup>OD</sup> and b) Rev<sup>ODΔ</sup>. *Top*, Differential power time course of raw injection heats for a titration of Imp $\beta$  into the Rev protein solutions. *Bottom*, Normalized binding isotherms corrected for the heat of dilution of Imp $\beta$  into buffer. The solid line represents a nonlinear least squares fit using a model consisting of two non-symmetric classes of binding sites. **c,d.** Thermodynamic values obtained from ITC data for the binding of Imp $\beta$  to c) Rev<sup>OD</sup> and d) Rev<sup>ODΔ</sup>. Binding to site 1 is characterized by a favourable enthalpy ( $\Delta H \approx -8$  kcal/mol) and a negligible entropy change for both Rev<sup>OD</sup> and Rev<sup>ODΔ</sup>, whereas binding to site 2 is associated with an unfavourable entropy change that is offset by a large negative enthalpy change. Thermodynamic parameters (in kcal/mol) are as follows: Rev<sup>OD</sup>:  $\Delta G = -8.3 \pm 0.1$  and  $-6.8 \pm 0.1$ ,  $\Delta H = -8.8 \pm 0.2$  and  $-29.8 \pm 0.9$ ,  $-T\Delta S = 0.6 \pm 0.3$  and  $23.1 \pm 0.8$  for sites 1 and 2, respectively; Rev<sup>ODΔ</sup>:  $\Delta G = 8.4 \pm 0.1$  and  $-7.5 \pm 0.7$ ,  $\Delta H = -8.6 \pm 0.5$  and  $-24.1 \pm 4.9$ ,  $-T\Delta S = 0.2 \pm 0.6$  and  $16.6 \pm 5.7$  for sites 1 and 2, respectively.

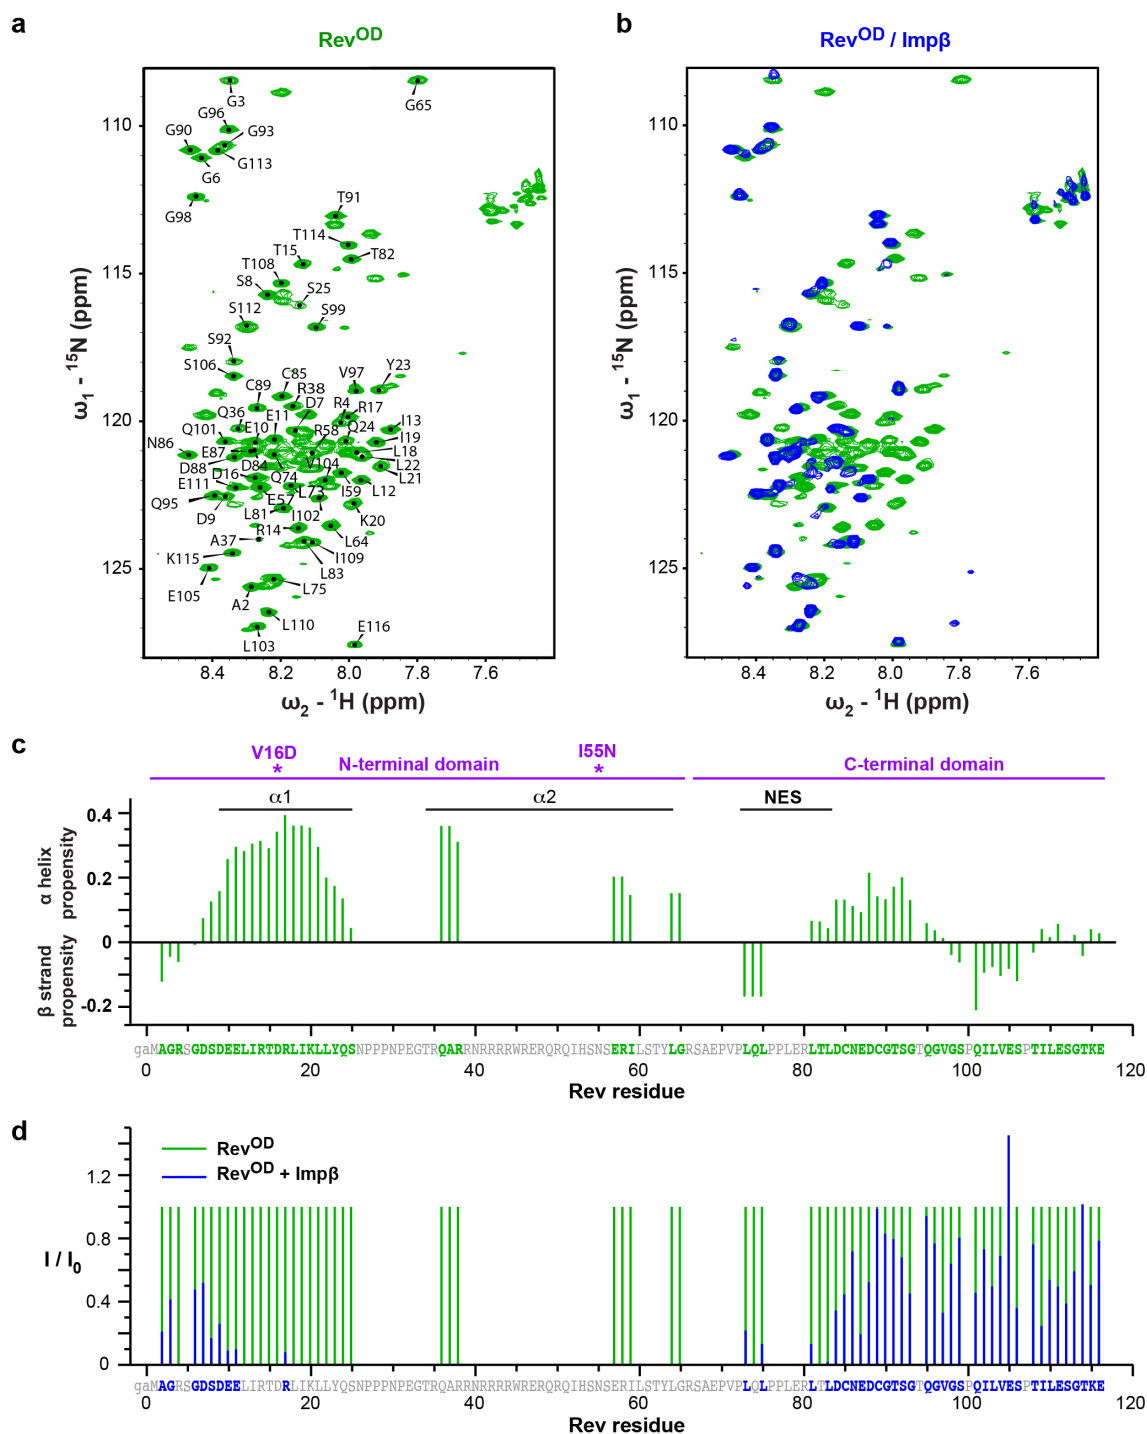

**Figure 4. NMR analysis of Rev binding by Imp $\beta$ .** **a.**  $^1\text{H}, ^{15}\text{N}$  HSQC spectrum of free Rev<sup>OD</sup> (600MHz, 283K). **b.**  $^1\text{H}, ^{15}\text{N}$ -HSQC spectrum Imp $\beta$ -bound Rev<sup>OD</sup> (blue) superimposed on that of unbound Rev<sup>OD</sup> (green). **c.** Secondary chemical shifts<sup>127</sup> of unbound Rev<sup>OD</sup>. The two point mutations are indicated by asterisks. **d.** Ratio of peak intensities for Rev residues in the presence and absence of Imp $\beta$  (600MHz, 283K).

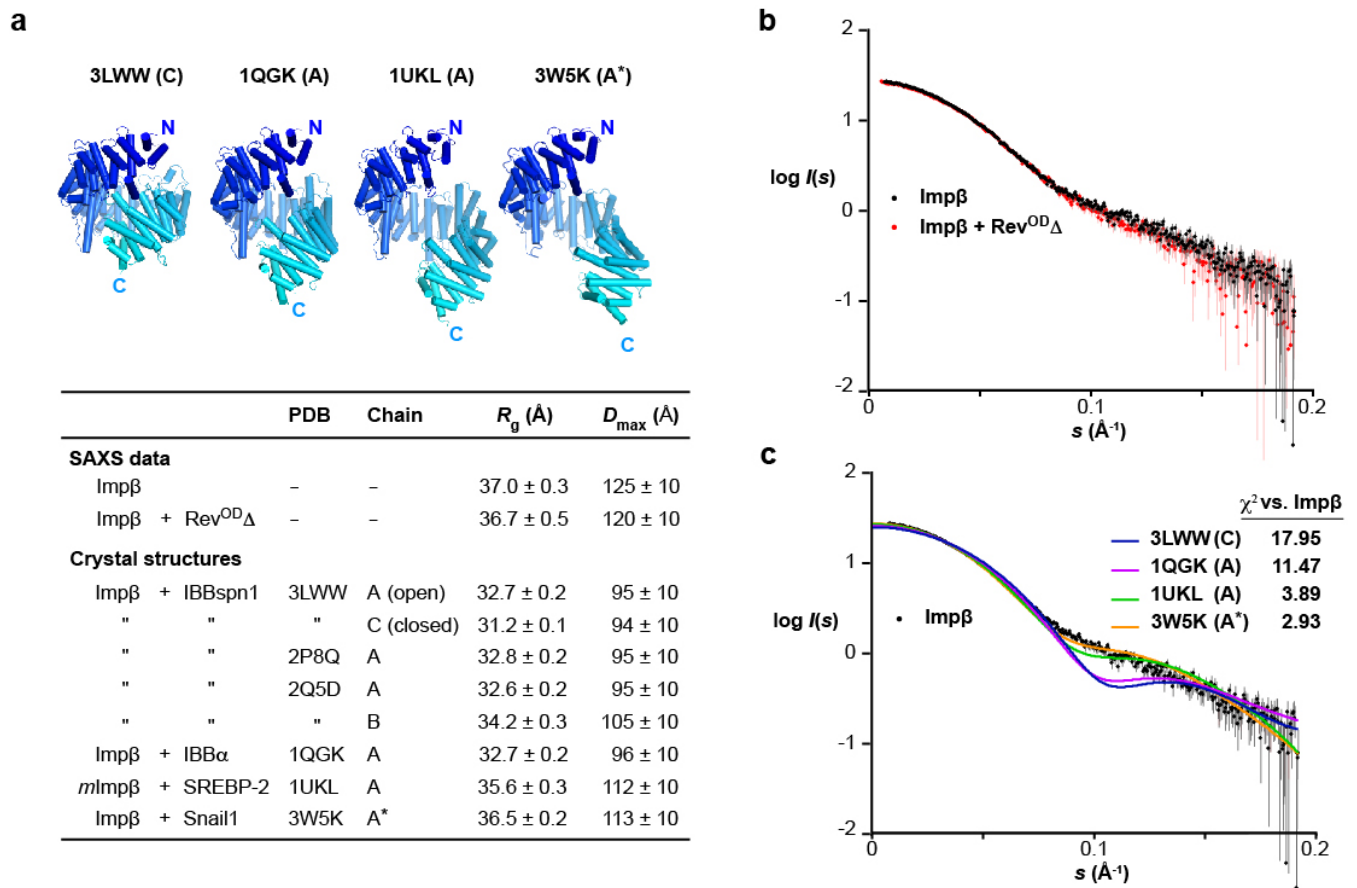

**Figure 5. Impβ retains an extended conformation upon binding Rev.** **a. Top.** Representative crystal structures of Impβ illustrating different degrees of compaction of the HEAT-repeat array. **Bottom.** Model-independent parameters obtained from SAXS data compared to values calculated for available Impβ crystal structures using the programs CRY SOL<sup>124</sup> and PRIMUS<sup>123</sup>. All structures are of human Impβ except for 1UKL which is of murine Impβ. Chain A in 3W5K lacks coordinates for Impβ residues 1-15. For the calculation of  $R_g$ ,  $D_{max}$  and  $\chi^2$  values this chain was extended to include these residues (denoted A\*) by replacing HEAT repeat 1 (residues 1-31) by the corresponding residues from 1UKL following local alignment of the two structures. **b.** Scattering data from unbound Impβ (black) and the Impβ/Rev<sup>ODΔ</sup> complex (red). **c.** Scattering data from unbound Impβ (black) compared to profiles calculated from representative cargo-bound conformations exhibiting different degrees of elongation (colored lines).

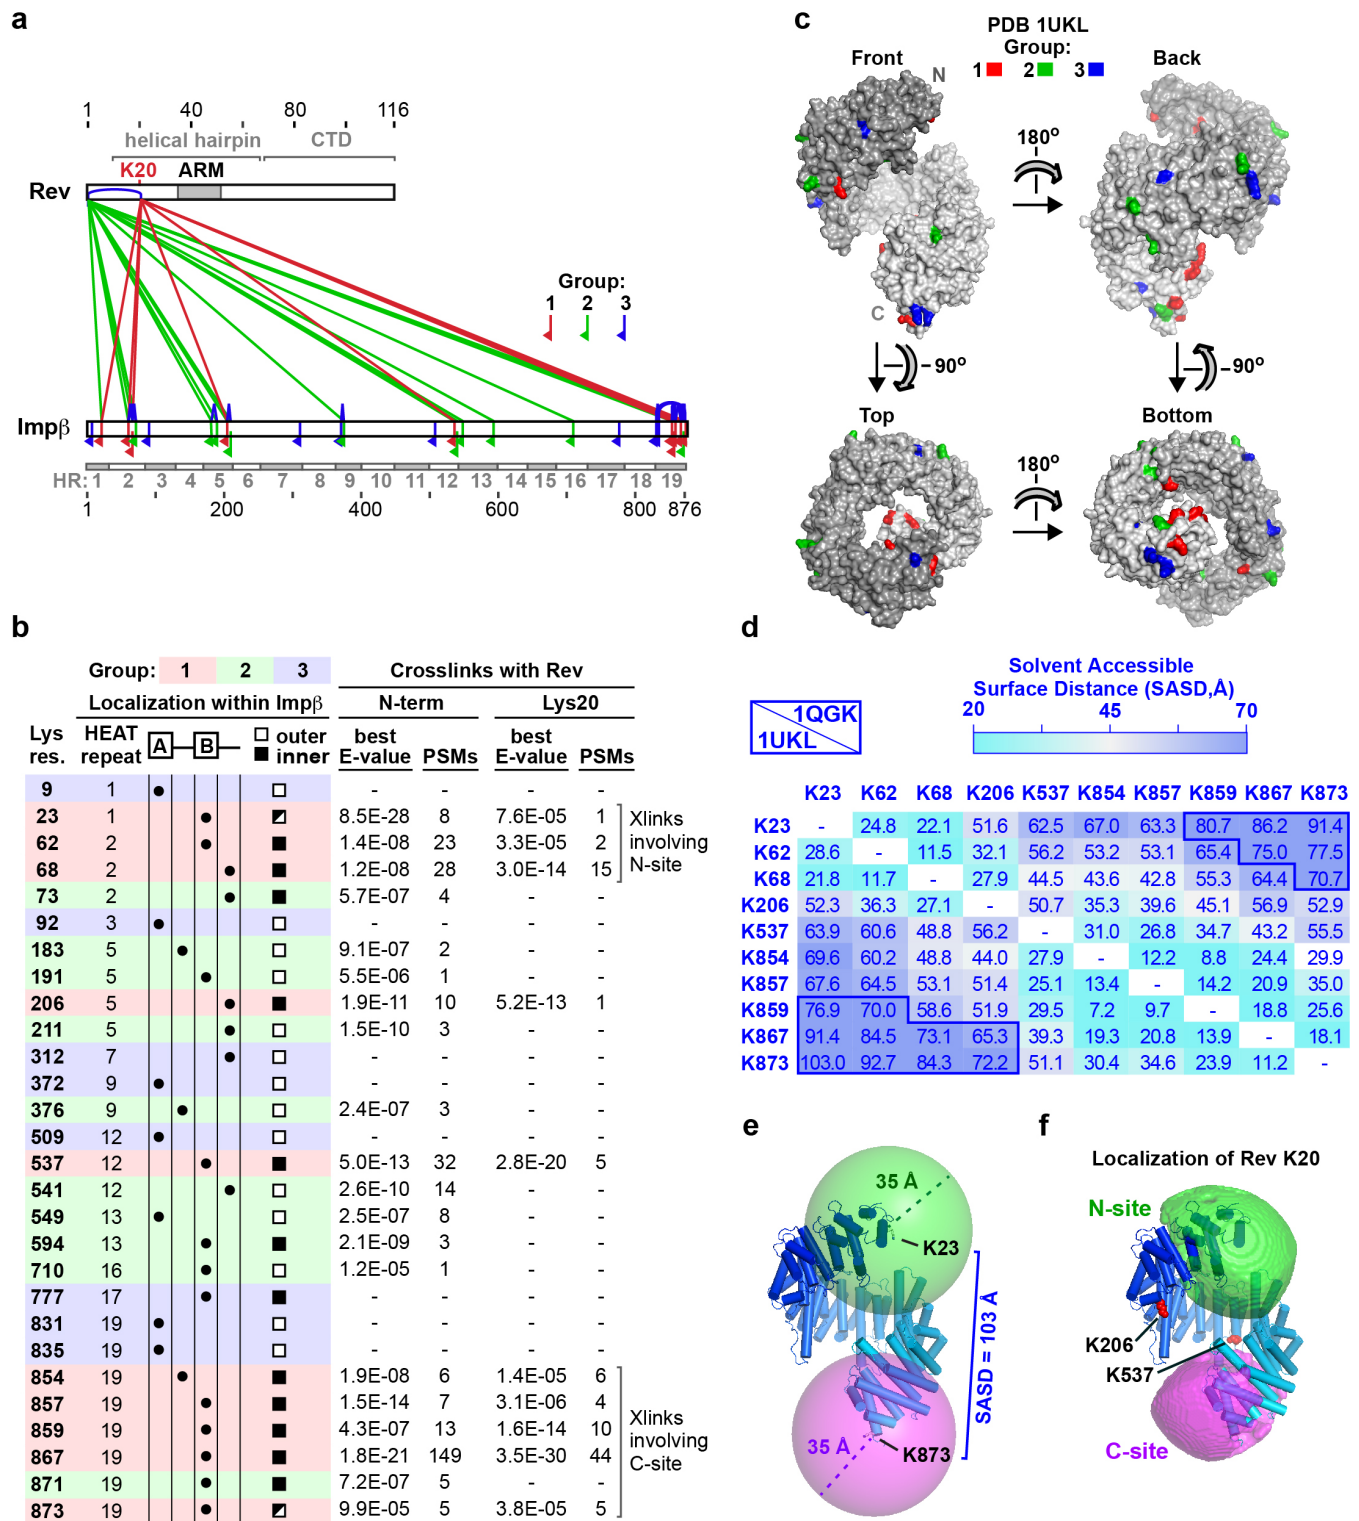

**Figure 6. Crosslinking-MS localizes two Rev-binding regions on Impβ.** **a.** Graphical summary of crosslinks. Impβ-Rev crosslinks involving the N-terminus or Lys20 residue of Rev are shown in green and red, respectively. Rev-Rev and Impβ-Impβ crosslinks and monolinks are shown in blue. Red, green and blue inverted flags indicate Impβ residues that form crosslinks with Rev Lys20 (Group 1), with both Rev Lys20 and the Rev N-terminus (Group 2), or for which no crosslinks with Rev were detected (Group 3), respectively. The 19 HEAT repeats (HR) of Impβ are indicated. **b.** Impβ Lys residues modified by BS3 and detected in crosslinks or monolinks. Group 1, 2 and 3 lysines are highlighted in red, green and blue, respectively. For Group-1 and -2 lysines the number of peptide spectrum matches (PSMs) and the best pLink E-value score is indicated. **c.** Surface representation of Impβ showing the location of crosslinked Group-1, -2 and -3 Lys residues, colored red, green and blue, respectively. Shading is from dark to light gray from N- to C-terminus. **d.** Solvent-accessible surface distances (SASDs) between pairs of Impβ

Group-1 Lys residues. The upper and lower triangles show distances for the conformations of Imp $\beta$  bound to the Importin  $\alpha$  IBB domain (PDB 1QGK) and to SREBP-2 (PDB 1UKL), respectively. SASDs over 70 Å are outlined in dark blue. Distances were calculated using the Jwalk webserver<sup>98</sup>. The SAS distances shown here and in **Figure S3b** suggest that Lys23, Lys62 and Lys68 crosslink with Rev at the N-site, and that Lys854, Lys857, Lys859, Lys867 and Lys873 crosslink with Rev at the C-site. **e.** Spheres of radius 35 Å centered on the C $\alpha$  atoms of Group-1 residues Lys23 and Lys873 show that BS3 molecules bound to these two lysines cannot crosslink to the same Rev Lys20 position. **f.** Localization of the C $\alpha$  atom of Rev Lys20. Green and magenta volumes show the N- and C-terminal regions of space within crosslinking distance of Group-1 residues in either HEAT repeats 1 and 2 (K23, K62, K68) or repeat 19 (K854, K857, K859, K867 and K873), respectively, defined by the intersection of 35 Å spheres centered on the C $\alpha$  atoms of these residues. If the centroid of each envelope is used to estimate the position of the Rev K20 C $\alpha$  atom, then the positional uncertainty, calculated as the rmsd of each grid point within the envelope (sampled on a 2 Å grid) relative to the centroid, is 22.8 Å for the N-site and 21.6 Å for the C-site for the 1UKL conformation. The Imp $\beta$  conformation shown in panels c, e and f is that of SREBP-2-bound Imp $\beta$  (PDB 1UKL).

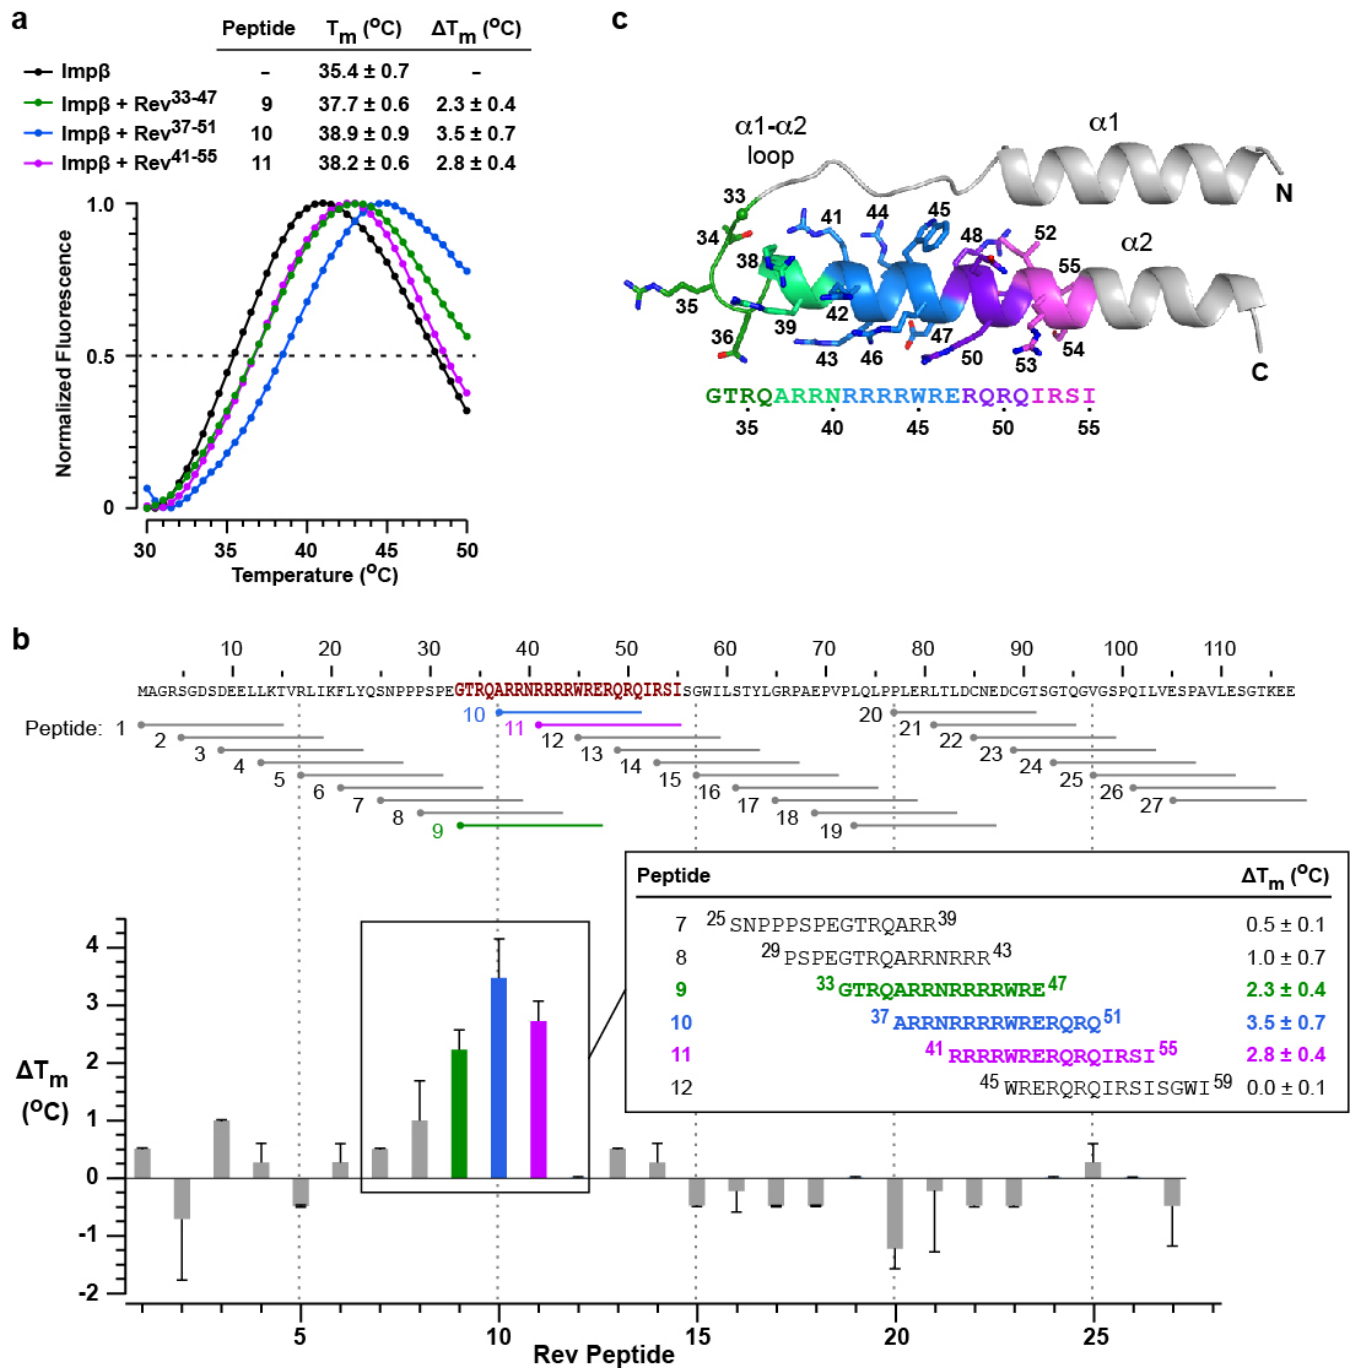

**Figure 7. Imp $\beta$  recognizes Rev peptides derived from helix  $\alpha 2$  and the  $\alpha 1$ - $\alpha 2$  loop. a.** Examples of thermal denaturation curves measured by differential scanning fluorimetry (DSF) of Imp $\beta$  in the presence and absence of Rev peptides. Data are shown for Rev peptides 9-11. The melting temperature ( $T_m$ ) and difference in  $T_m$  compared to unbound Imp $\beta$  ( $\Delta T_m$ ) are listed as mean values  $\pm$  SD from three independent experiments. **b.** Summary of  $\Delta T_m$  values determined by DSF analysis of Imp $\beta$  for all 27 peptides spanning the Rev sequence. Details are shown for peptides 7-12. **c.** Structure of the Rev N-terminal domain highlighting the residues in helix  $\alpha 2$  and the  $\alpha 1$ - $\alpha 2$  loop spanned by Rev peptides 9-11. Atomic coordinates are taken from PDB 2X7L<sup>69</sup>.

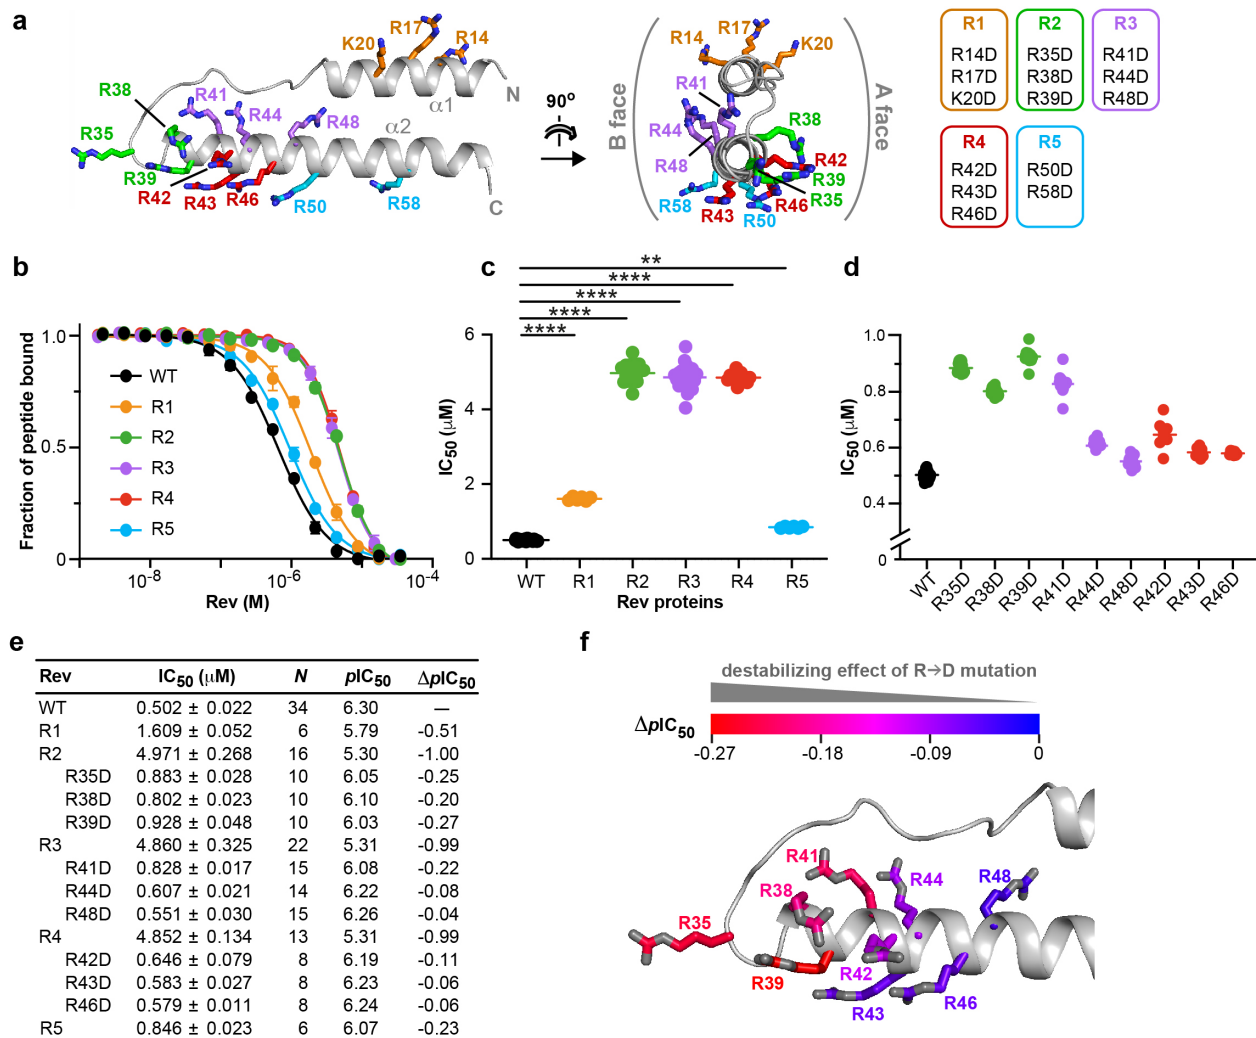

**Figure 8. Charge-reversal mutations identify an Imp $\beta$ -binding epitope on Rev. a.** Rev double and triple R/K $\rightarrow$ D substitution mutations. **b.** Competitive fluorescence polarization (FP) inhibition assays showing the ability of WT and mutant forms of Rev to displace a fluorescently labelled Rev-NLS peptide from Imp $\beta$ . A representative experiment is shown for each protein. Data shown are mean and s.d. values from two technical replicates. **c.** Plot of IC<sub>50</sub> values derived from FP inhibition assays for WT Rev and double and triple mutants. \*\*\*\* $P \leq 0.001$ ; \*\* $P \leq 0.01$ .  $P$ -values were determined using an ordinary ANOVA test. **d.** Plot of IC<sub>50</sub> values for WT Rev and single R $\rightarrow$ D point mutants. **e.** Summary of IC<sub>50</sub> (mean  $\pm$  s.d.) and corresponding pIC<sub>50</sub> values.  $N$  represents the number of biological replicates.  $\Delta$ pIC<sub>50</sub> values are reported relative to WT Rev. **f.** View of the Rev helical hairpin showing the Arg residues selected for single point mutations. Carbon atoms are colored from blue to red in order of increasing ability of the R $\rightarrow$ D substitution to compromise Imp $\beta$  recognition, as measured by  $\Delta$ pIC<sub>50</sub> values.



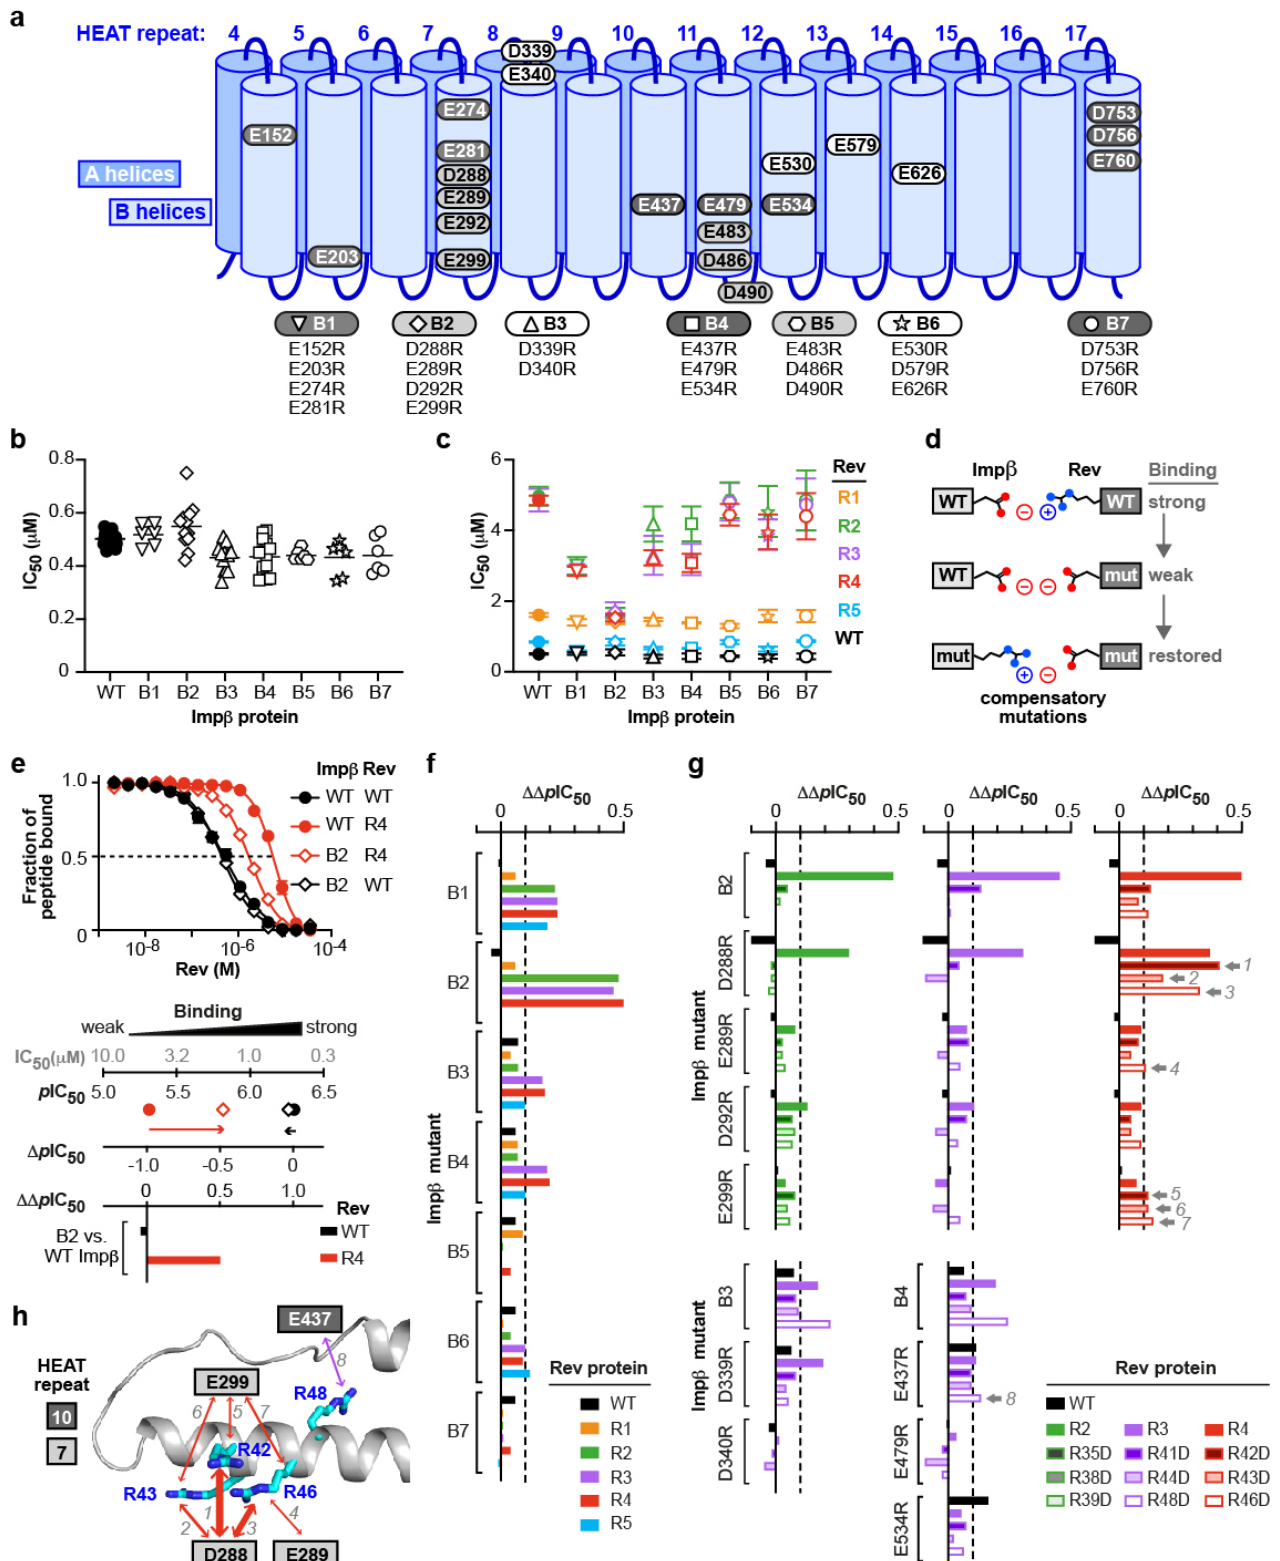

**Figure 9. Compensatory effects between charge-reversal mutants of Imp $\beta$  and Rev.** **a.** Multiple point mutants of Imp $\beta$  in which 2-4 Asp or Glu residues are replaced by Arg residues. **b.**  $IC_{50}$  values obtained from FP inhibition assays measuring the ability of WT Rev to displace a Rev-NLS peptide from WT or mutant forms of Imp $\beta$ . Results from individual assays are shown together with the mean. **c.** The same assay performed with WT and charge-reversal mutant forms of Rev. Data for Rev mutants are colored as in **Figure 8**. Data shown are mean and s.d. values from 4-14 biological replicates. (See also **Table S1**). **d.** Compensatory effects between charge-reversal mutants. An interaction between an acidic residue on Imp $\beta$  and an Arg residue on Rev is disrupted by a charge reversal (R→D) mutation of Rev. The interaction is restored by a charge reversal (D/E→R) mutation on Imp $\beta$ . **e.** Derivation of  $\Delta\Delta pIC_{50}$  values. *Top.* FP inhibition assays performed with WT Rev (black curves) or the R4 mutant

(red curves) together with WT Imp $\beta$  (circles) or the B2 mutant (diamonds). *Bottom*. The ability of WT or mutant Rev to displace the Rev-NLS peptide from WT or mutant Imp $\beta$  is plotted as  $pIC_{50}$  values and as the shift ( $\Delta pIC_{50}$ ) relative to the value observed when WT Rev is assayed with WT Imp $\beta$ . The  $\Delta\Delta pIC_{50}$  value represents the shift in  $\Delta pIC_{50}$  observed when the assay is performed with an Imp $\beta$  mutant instead of WT Imp $\beta$ . A positive value of  $\Delta\Delta pIC_{50}$  indicates that the tested Rev mutant more potently displaces the Rev-NLS peptide from the indicated Imp $\beta$  mutant than from WT Imp $\beta$ . **f,g**. Summary of  $\Delta\Delta pIC_{50}$  values for the indicated combinations of Imp $\beta$  and Rev proteins. The dotted line at  $\Delta\Delta pIC_{50} = 0.1$  (corresponding to a 21% decrease in  $IC_{50}$  between the mutant and WT Imp $\beta$ ) indicates the threshold used to identify compensatory mutations. Compensatory effects satisfying this criterion involving single point mutants of Imp $\beta$  and Rev are marked by a grey arrow and numbered 1 to 8. For all eight of these mutant combinations, the mean shift in  $IC_{50}$  value observed with the Imp $\beta$  single point mutant relative to WT Imp $\beta$  was statistically significant according to a Dunnett's multiple comparisons test ( $p$  values for mutant combinations 1-8 were  $<0.0001$ ,  $0.0002$ ,  $0.0001$ ,  $0.0022$ ,  $0.0368$ ,  $0.0084$ ,  $<0.0001$  and  $0.0127$ , respectively). **h**. Summary of compensatory interactions involving single Imp $\beta$  and Rev residues. The numbered arrows correspond to the mutant combinations numbered 1-8 in **g**. The thickness of arrows is proportional to the  $\Delta\Delta pIC_{50}$  values of the interacting mutants.

**a Interactions used for Docking:**

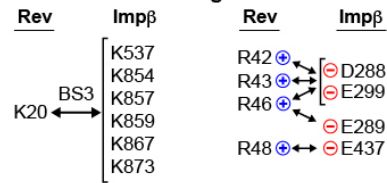

**Rigid Body docking:**

- interactions used as constraints  
(strict distance cutoff applied)

**HADDOCK:**

- interactions used as restraints  
(contributing to total configuration energy)

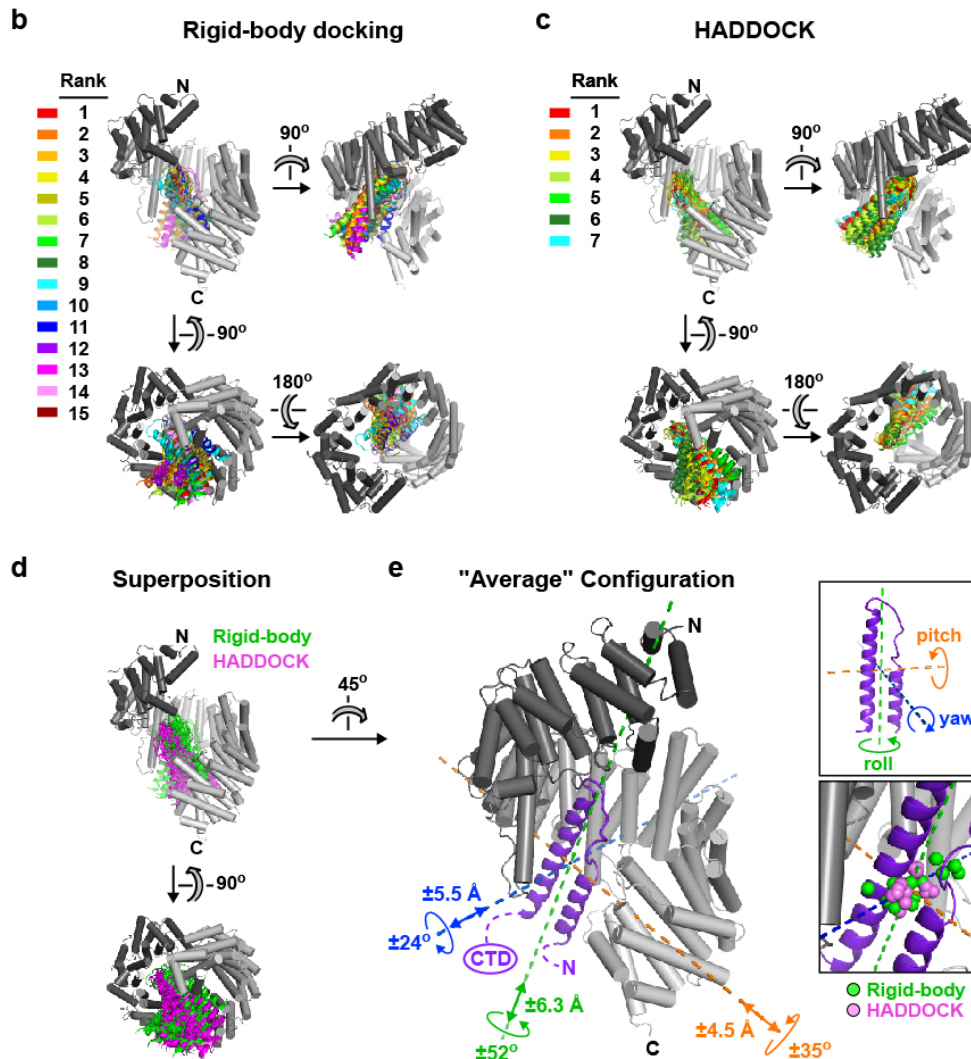

**Figure 10. Structural model of Rev bound to Imp $\beta$  at the C-site.** **a.** BS3 crosslinks and electrostatic interactions used as distance constraints for rigid body docking and as interaction restraints in program HADDOCK. **b.** Configurations of the Imp $\beta$ /Rev complex obtained by rigid body docking. The mean variation in Rev orientation and centroid position are 33° and <5 Å, respectively, relative to the top-ranked configuration (see also **Table S3**). **c.** Configurations of the Imp $\beta$ /Rev complex obtained using HADDOCK. For clarity, only 28 (the four lowest-energy structures in each of the 7 clusters) of the 194 clustered solutions are shown. Solutions are colored according to the rank of the corresponding cluster. The mean variation in Rev orientation and centroid position are 34° and 4 Å, respectively (see also **Table S4**). **d.** Superposition showing agreement between docking solutions obtained by rigid body sampling and by HADDOCK. **e.** "Average" configuration of the Imp $\beta$ /Rev complex that minimizes the deviation from models obtained by rigid-body and HADDOCK docking experiments. Compared to the average configuration, the Rev orientation in the individual rigid-body and HADDOCK configurations shows the greatest variation (by a maximum of 52°) in the angle about the long axis of Rev (roll angle) and smaller variations (up to 25-35°) about the two orthogonal angles (yaw and pitch). The approximate location of the Rev CTD is indicated. *Upper inset.* Principal axes and corresponding rotational angles of Rev. *Lower inset.* Centroids of Rev monomers obtained in rigid-body (green spheres) and HADDOCK (violet spheres) docking experiments. These centroids differ from that of the average model by a maximum of 5 or 6 Å along each of the principal axes of Rev.
